# Supplementary material for: Succinyl-proteome profiling of a high taxol containing hybrid Taxus species (Taxus × media) revealed involvement of succinylation in multiple metabolic pathways
Source: PubMed Central journal article supplement (PMC4763222; doi:10.1038/srep21764), 2016-02-23
Supplement: srep21764-s1.pdf [file srep21764-s1.pdf]

**Succinyl-proteome profiling of a high taxol containing hybrid *Taxus* species (*Taxus* × *media*) revealed involvement of succinylation in multiple metabolic pathways**

Chenjia Shen<sup>1</sup>, Jie Xue<sup>1</sup>, Tao Sun<sup>1</sup>, Hong Guo<sup>1</sup>, Lei Zhang<sup>2</sup>, Yijun Meng<sup>1,\*</sup>, Huizhong Wang<sup>1,\*</sup>

<sup>1</sup>College of Life and Environmental Sciences, Hangzhou Normal University, Hangzhou 310036, China.

<sup>2</sup>Department of Plant Pathology, North Carolina State University, Raleigh, North Carolina 27607

Yijun Meng

Email: [mengyijun@zju.edu.cn](mailto:mengyijun@zju.edu.cn)

Huizhong Wang:

Email: [whz62@163.com](mailto:whz62@163.com)

Fig. S1

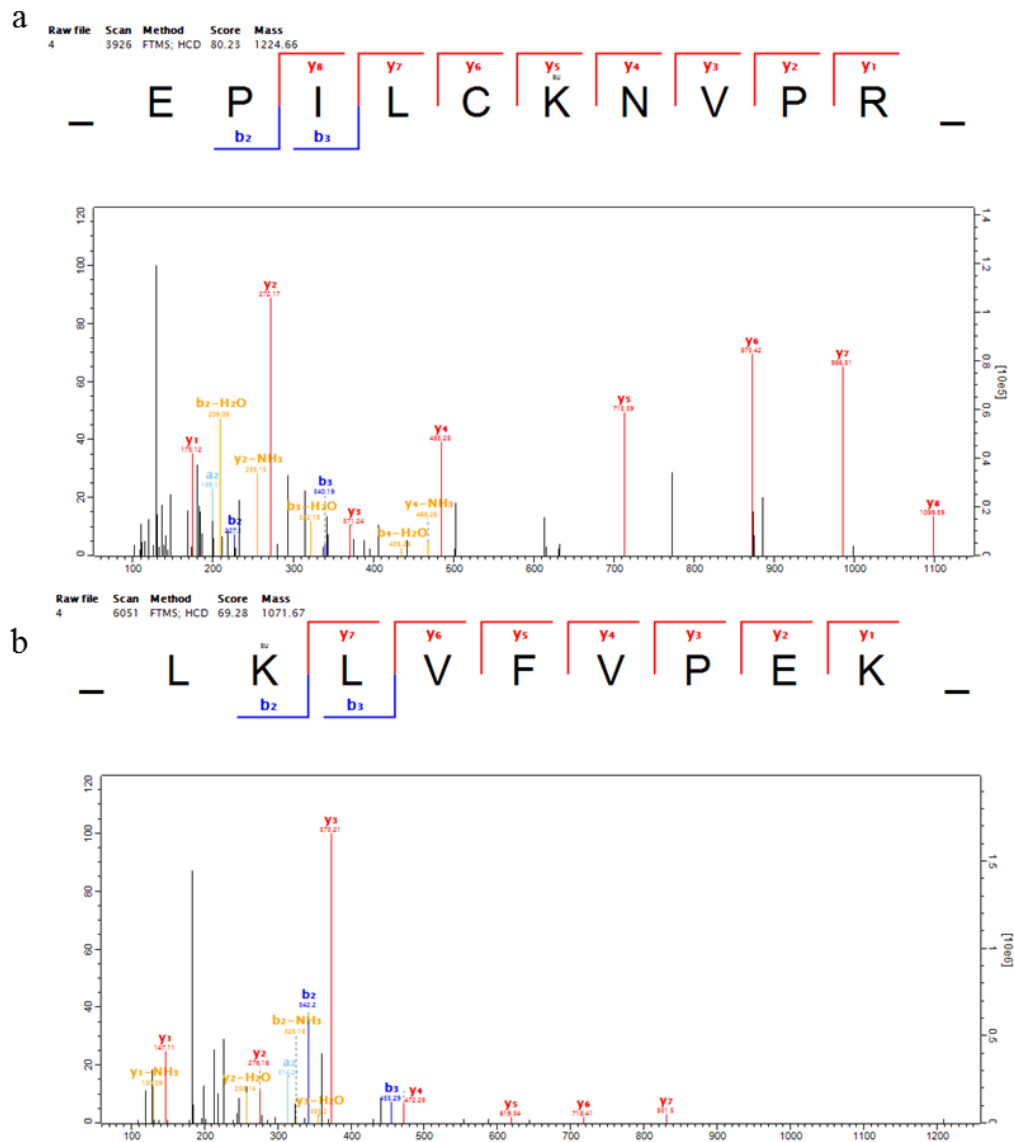

**Fig.S1: Representative MS/MS spectra of succinyl peptides from TCA cycle related enzyme IDH1 (Contig24602).** (a) Succinyl-peptide \_EPILCK(su)NVPR\_ with succinylation site at K117 in TCA cycle related enzyme IDH1. (b) Succinyl-peptide \_LK(su)LVFPVEK\_ with succinylation site at K155 in TCA cycle related enzyme IDH1.

Fig. S2

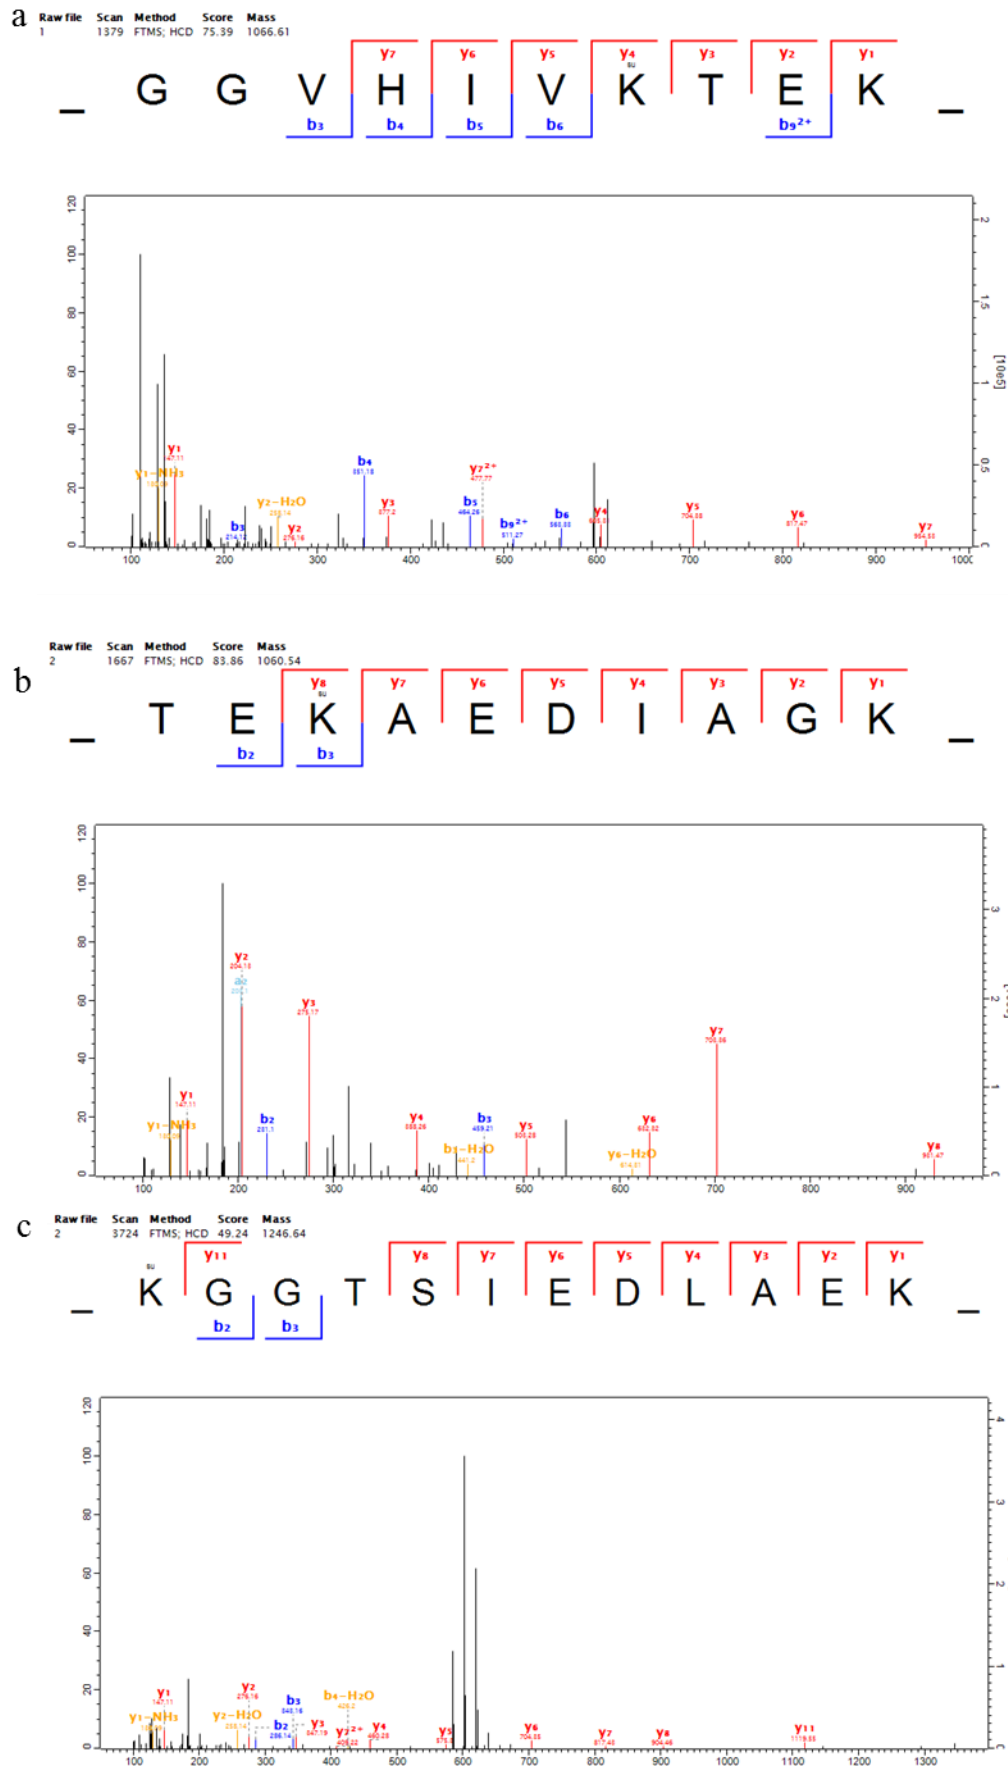

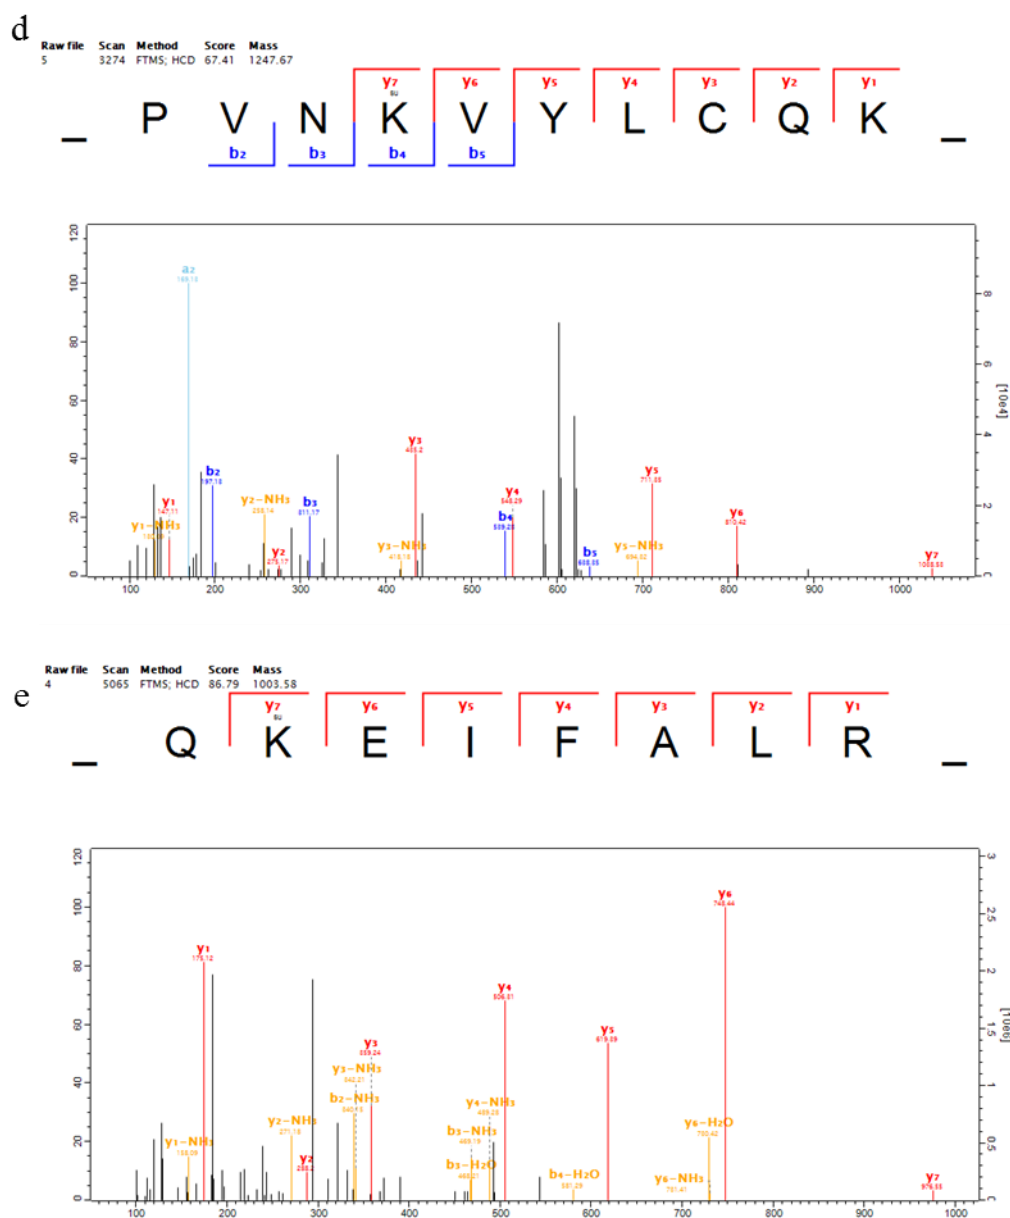

**Fig.S2: Representative MS/MS spectra of succinyl peptides from TCA cycle related enzyme LSC1 (Contig4446).** (a) Succinyl-peptide \_GGVHIVK(su)TEK\_ with succinylation site at K97 in TCA cycle related enzyme LSC1. (b) Succinyl-peptide \_TEK(su)AEDIAGK\_ with succinylation site at K100 in TCA cycle related enzyme LSC1. (c) Succinyl-peptide \_K(su)GGTSIEDLAEK\_ with succinylation site at K160 in TCA cycle related enzyme LSC1. (d) Succinyl-peptide \_PVNKS(su)VYLCQK\_ with succinylation site at K127 in TCA cycle related enzyme LSC1. (e) Succinyl-peptide \_QK(su)EIFALR\_ with succinylation site at K259 in TCA cycle related enzyme LSC1.



Fig. S4

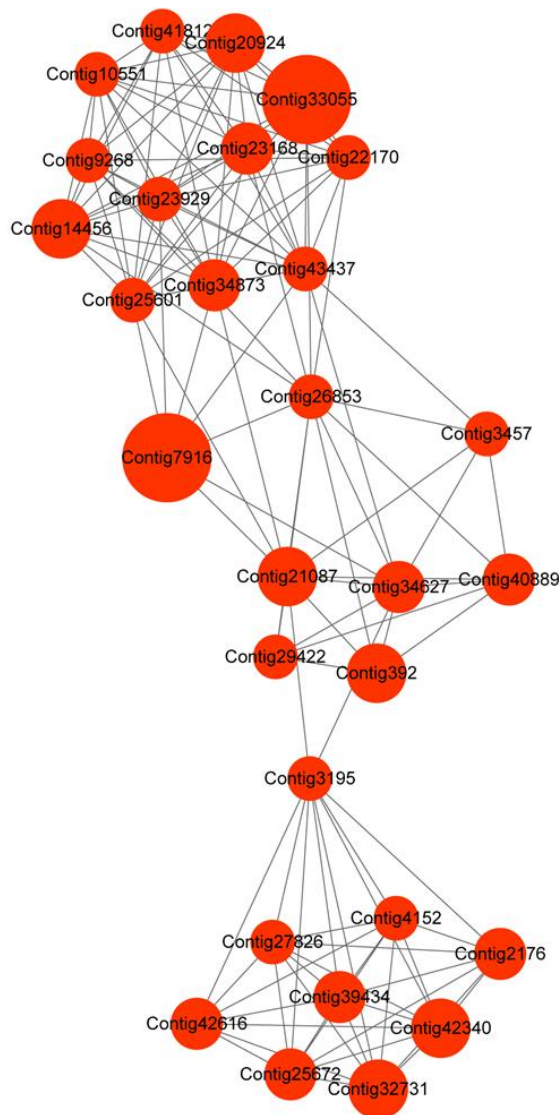

**Fig.S4: Top seven clusters of highly interconnected lysine-succinylated protein networks.** Interaction network of lysine-succinylated oxidative phosphorylation proteins (listed in gene names) was analyzed by the Cytoscape software (version 3.0.1).

Fig. S5

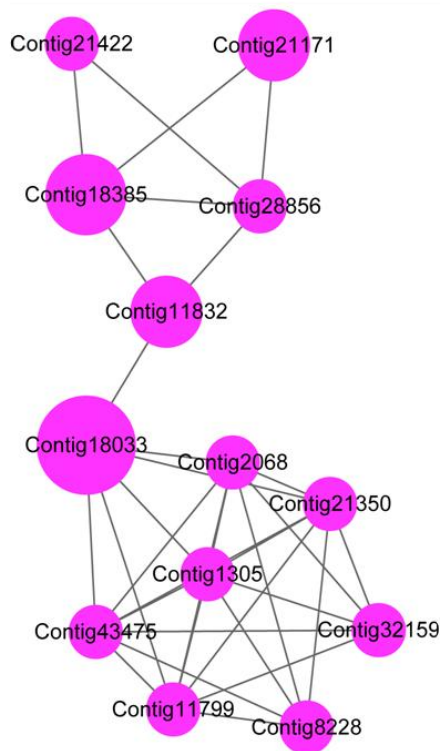

**Fig.S5: Top seven clusters of highly interconnected lysine-succinylated protein networks.** Interaction network of lysine-succinylated photosynthesis-associated proteins (listed in gene names) was analyzed by the Cytoscape software (version 3.0.1).

Fig. S6

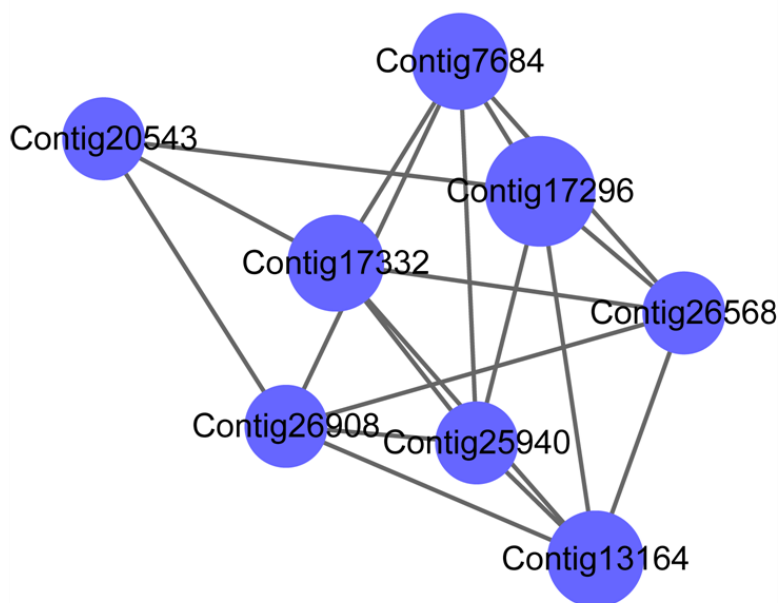

**Fig.S6: Top seven clusters of highly interconnected lysine-succinylated protein networks.** Interaction network of lysine-succinylated RNA degradation-related proteins (listed in gene names) was analyzed by the Cytoscape software (version 3.0.1).



Fig. S7

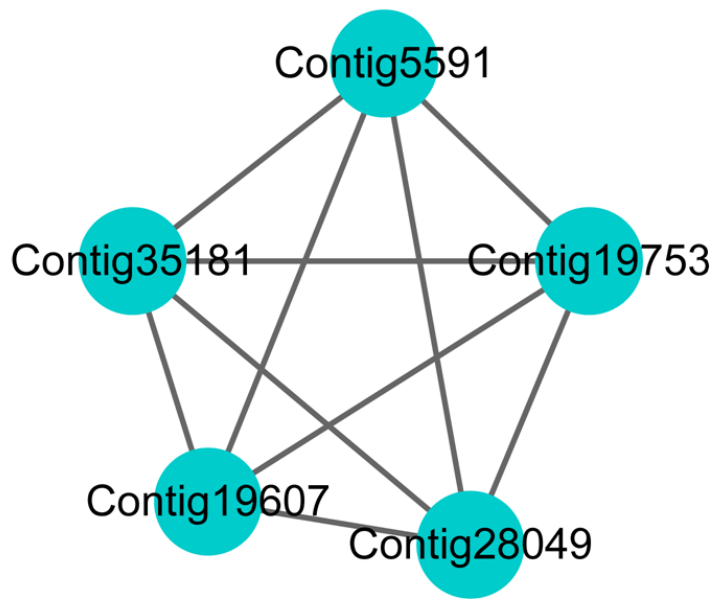

**Fig.S7: Top seven clusters of highly interconnected lysine-succinylated protein networks.** Interaction network of lysine-succinylated ribosome-associated proteins (listed in gene names) was analyzed by the Cytoscape software (version 3.0.1).

Fig. S8

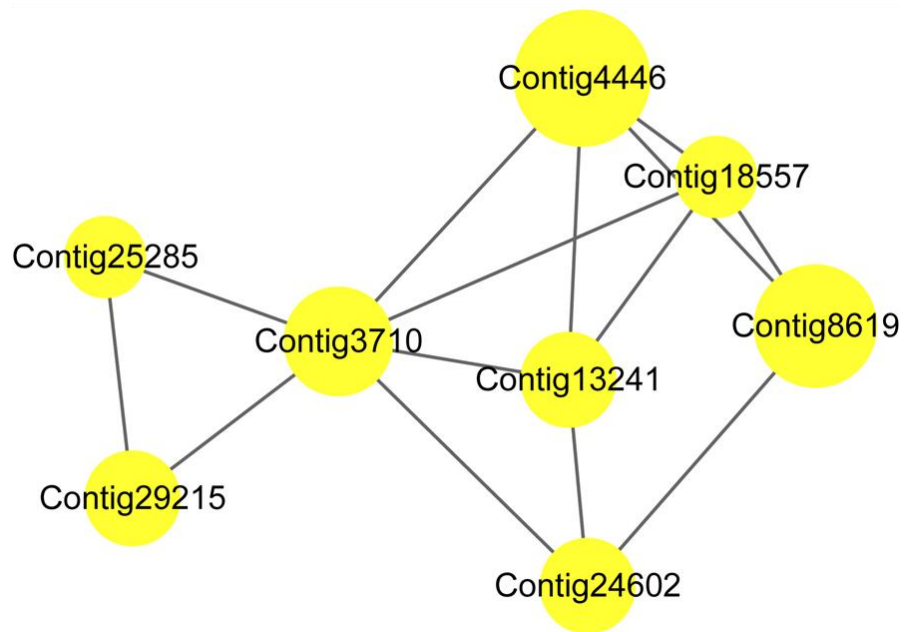

**Fig.S8: Top seven clusters of highly interconnected lysine-succinylated protein networks.** Interaction network of lysine-succinylated TCA cycle-related proteins (listed in gene names) was analyzed by the Cytoscape software (version 3.0.1).

Table S1. The information of succinylated peptides from histone proteins.

| Protein     | Localization prob | PEP        | Modified sequence        | Modification (K) Probabilities | Position | Mass error [ppm] | Peptide Score |
|-------------|-------------------|------------|--------------------------|--------------------------------|----------|------------------|---------------|
| Contig22504 | 1                 | 0.00180931 | <u>_EIAQDFK(su)TDLR_</u> | EIAQDFK(1)TDLR                 | 79       | -2.958           | 66.267        |

Table S2. The information of succinylated sites in each succinylated protein.

| Protein     | Localization prob | PEP         | Modified sequence                   | Modification (K) Probabilities   | Position | Mass error [ppm] | Peptide Score |
|-------------|-------------------|-------------|-------------------------------------|----------------------------------|----------|------------------|---------------|
| Contig15874 | 1                 | 0.0270453   | _RPQAK(su)AHFAK_                    | RPQAK(1)AHFAK                    | 499      | 0.23561          | 63.426        |
| Contig20543 | 1                 | 0.000000138 | _AVEQK(su)QVAQQEAER_                | AVEQK(1)QVAQQEAER                | 190      | 0.48491          | 103.76        |
| Contig5591  | 1                 | 0.00184586  | _LIFAGK(su)QLEDGR_                  | LIFAGK(1)QLEDGR                  | 48       | 0.02452          | 63.091        |
| Contig10551 | 1                 | 0.0000989   | _TVTLEQK(su)IDR_                    | TVTLEQK(1)IDR                    | 206      | 0.47231          | 113.93        |
| Contig10651 | 1                 | 0.00544328  | _K(su)FLLNIR_                       | K(1)FLLNIR                       | 731      | -1.184           | 88.643        |
| Contig10828 | 1                 | 0.000457311 | _GDVNSITVSGTNIQDNTLVHVAK(su)SNLGGK_ | GDVNSITVSGTNIQDNTLVHVAK(1)SNLGGK | 110      | 1.0198           | 77.149        |
| Contig11799 | 1                 | 0.0227411   | _ESK(su)AFQK_                       | ESK(1)AFQK                       | 87       | -0.061967        | 64.803        |
| Contig11832 | 1                 | 0.000525726 | _IAGVYNPK(su)R_                     | IAGVYNPK(1)R                     | 181      | -0.34687         | 103.74        |
| Contig11832 | 1                 | 0.0000558   | _ISFTK(su)EETEYLTNR_                | ISFTK(1)EETEYLTNR                | 237      | 1.8414           | 76.759        |
| Contig11832 | 0.893329          | 0.0000683   | _LKK(su)ELQGSIDK_                   | LK(0.107)K(0.893)ELQGSIDK        | 338      | -0.087269        | 111.63        |
| Contig11938 | 0.956398          | 0.0254542   | _EEPSEIK(su)DLKR_                   | EEPSEIK(0.956)DLK(0.044)R        | 98       | 0.25321          | 60.255        |
| Contig12149 | 1                 | 0.00202831  | _FK(su)DEIIPVETK_                   | FK(1)DEIIPVETK                   | 233      | -0.94408         | 65.179        |
| Contig12149 | 1                 | 0.00798226  | _LVDPK(su)TGDEK_                    | LVDPK(1)TGDEK                    | 247      | -0.5309          | 64.82         |
| Contig6895  | 1                 | 0.0323334   | _K(su)MGWDEK_                       | K(1)MGWDEK                       | 147      | -0.41556         | 58.815        |
| Contig12178 | 1                 | 0.00633007  | _YQVK(su)GIDNLR_                    | YQVK(1)GIDNLR                    | 494      | 0.30324          | 63.624        |
| Contig12483 | 1                 | 0.00281111  | _LK(su)TPVENSLR_                    | LK(1)TPVENSLR                    | 382      | 0.69594          | 69.346        |
| Contig8119  | 1                 | 0.0172718   | _DPSFSK(su)IEPR_                    | DPSFSK(1)IEPR                    | 110      | -0.9893          | 55.721        |
| Contig12663 | 1                 | 0.0175124   | _TLK(su)EVQIIPPVVPYR_               | TLK(1)EVQIIPPVVPYR               | 30       | 1.0317           | 47.037        |
| Contig5689  | 1                 | 0.00000677  | _IMALDLPHGGHLSHGYQTDTK(su)K_        | IMALDLPHGGHLSHGYQTDTK(1)K        | 191      | 1.0978           | 69.03         |
| Contig5689  | 1                 | 0.0349279   | _VLELAHIAANK(su)NTVPGDVSAMVPGGIR_   | VLELAHIAANK(1)NTVPGDVSAMVPGGIR   | 418      | 0.79412          | 49.765        |
| Contig1305  | 1                 | 0.00198227  | _LYVCK(su)AQAGDK_                   | LYVCK(1)AQAGDK                   | 204      | -0.10256         | 67.08         |
| Contig13164 | 1                 | 0.0288178   | _LNSGK(su)VVA VGPGAR_               | LNSGK(1)VVA VGPGAR               | 40       | 1.6575           | 51.726        |
| Contig13164 | 1                 | 0.000932214 | _NK(su)EGNIIPVSLK_                  | NK(1)EGNIIPVSLK                  | 51       | -1.8788          | 70.438        |
| Contig13241 | 1                 | 0.00859281  | _SFEDVK(su)IADR_                    | SFEDVK(1)IADR                    | 540      | 0.68534          | 62.466        |
| Contig13241 | 1                 | 0.00042893  | _YAPTAK(su)DLASR_                   | YAPTAK(1)DLASR                   | 324      | -0.84453         | 80.014        |
| Contig13277 | 1                 | 0.0006158   | _AVA VLK(su)GNSK_                   | AVA VLK(1)GNSK                   | 17       | -0.28201         | 92.538        |
| Contig13371 | 1                 | 0.0272723   | _FYIK(su)FYDVK_                     | FYIK(1)FYDVK                     | 107      | -0.49673         | 49.06         |
| Contig13439 | 1                 | 0.00113532  | _AAALNPVDYK(su)IR_                  | AAALNPVDYK(1)IR                  | 46       | -1.6047          | 68.536        |
| Contig13439 | 1                 | 0.000127526 | _EAFK(su)HLESGR_                    | EAFK(1)HLESGR                    | 294      | -0.12298         | 107.58        |
| Contig136   | 1                 | 0.00187171  | _LLK(su)QEPR_                       | LLK(1)QEPR                       | 19       | 0.25747          | 117.93        |
| Contig136   | 1                 | 0.0000534   | _NIANMVPPYQK(su)K_                  | NIANMVPPYQK(1)K                  | 132      | 0.025835         | 75.416        |
| Contig18385 | 1                 | 0.0149711   | _AYEK(su)GISK_                      | AYEK(1)GISK                      | 92       | -0.52004         | 66.351        |
| Contig18385 | 1                 | 0.00669624  | _EYVWK(su)TLK_                      | EYVWK(1)TLK                      | 238      | -0.30231         | 73.665        |
| Contig18385 | 1                 | 0.000550155 | _TLK(su)SGQVVPGYGHGVLRL_            | TLK(1)SGQVVPGYGHGVLRL            | 241      | 0.98432          | 65.038        |
| Contig18385 | 1                 | 7.23E-08    | _VK(su)NPWPNVDAHSGVLLNHFLTEDR_      | VK(1)NPWPNVDAHSGVLLNHFLTEDR      | 299      | -1.5567          | 84.602        |
| Contig14144 | 1                 | 0.0267531   | _FLM(ox)K(su)TLQQLGSK_              | FLMK(1)TLQQLGSK                  | 299      | 0.53642          | 49.978        |

|              |          |             |                         |                               |     |           |        |
|--------------|----------|-------------|-------------------------|-------------------------------|-----|-----------|--------|
| Contig 14144 | 1        | 0.000984057 | _LSEEEASK(su)LR_        | LSEEEASK(1)LR                 | 88  | 1.3303    | 82.417 |
| Contig 1425  | 1        | 0.000128754 | _ALCTGEK(su)GFGYK_      | ALCTGEK(1)GFGYK               | 141 | 0.31425   | 77.062 |
| Contig 1425  | 1        | 0.019716    | _GFGYK(su)GSSFHR_       | GFGYK(1)GSSFHR                | 146 | -0.50662  | 53.567 |
| Contig 1425  | 0.873243 | 0.0325407   | _K(su)TCKIVDSGELP_      | K(0.873)TCK(0.127)IVDSGELP    | 252 | 0.13763   | 55.261 |
| Contig 14376 | 0.998537 | 0.0173981   | _VVA VSK(su)TKPVSLIR_   | VVA VSK(0.999)TK(0.001)PVSLIR | 41  | 0.63002   | 65.895 |
| Contig 14456 | 1        | 0.000112126 | _GDLK(su)TDHYLPIHR_     | GDLK(1)TDHYLPIHR              | 196 | 1.3613    | 71.558 |
| Contig 14456 | 1        | 0.000137282 | _GVQK(su)VLQNYK_        | GVQK(1)VLQNYK                 | 465 | 0.20368   | 105.1  |
| Contig 14456 | 1        | 0.028331    | _IMNVIGEPIDEK(su)GDLK_  | IMNVIGEPIDEK(1)GDLK           | 192 | 1.6488    | 44.045 |
| Contig 17296 | 1        | 0.0174825   | _SIEFK(su)DR_           | SIEFK(1)DR                    | 95  | 0.37882   | 67.903 |
| Contig 17296 | 1        | 0.00998246  | _VCAIK(su)APGFGENR_     | VCAIK(1)APGFGENR              | 309 | 0.29695   | 57.106 |
| Contig 17296 | 1        | 0.0237986   | _VTMGPK(su)GR_          | VTMGPK(1)GR                   | 66  | -3.6816   | 60.478 |
| Contig 14654 | 1        | 0.0131241   | _DVDFDK(su)IAR_         | DVDFDK(1)IAR                  | 67  | -1.0259   | 62.463 |
| Contig 15015 | 1        | 0.017495    | _LVFVTNNSTK(su)SR_      | LVFVTNNSTK(1)SR               | 59  | -0.74997  | 53.448 |
| Contig 3575  | 1        | 0.0342779   | _VEGGW K(su)LDGQK_      | VEGGW K(1)LDGQK               | 186 | 1.3853    | 45.911 |
| Contig 15471 | 1        | 0.010187    | _A YPK(su)AFVR_         | A YPK(1)AFVR                  | 144 | 0.82018   | 69.998 |
| Contig 15471 | 1        | 0.00140028  | _EGHK(su)SPGYDGR_       | EGHK(1)SPGYDGR                | 105 | -0.46279  | 66.326 |
| Contig 15471 | 1        | 0.00459279  | _QIDYLLK(su)NK_         | QIDYLLK(1)NK                  | 84  | -0.34034  | 73.573 |
| Contig 15674 | 1        | 0.00483808  | _DDFIEK(su)DR_          | DDFIEK(1)DR                   | 356 | -1.6078   | 80.165 |
| Contig 15674 | 0.999951 | 0.00406678  | _DKLNK(su)YGR_          | DKLNK(1)YGR                   | 164 | -0.61858  | 95.531 |
| Contig 15674 | 1        | 0.010357    | _GHYLNATAGTCEEMMK(su)R_ | GHYLNATAGTCEEMMK(1)R          | 252 | -0.099932 | 41.088 |
| Contig 15674 | 1        | 0.00549276  | _LGLSAK(su)NYGR_        | LGLSAK(1)NYGR                 | 183 | -1.1725   | 67.334 |
| Contig 15674 | 1        | 0.030797    | _PK(su)LGLSAK_          | PK(1)LGLSAK                   | 177 | -0.82252  | 57.859 |
| Contig 15674 | 1        | 0.00744994  | _TETK(su)ASVGFK_        | TETK(1)ASVGFK                 | 8   | 0.09427   | 66.056 |
| Contig 15684 | 1        | 0.00764879  | _EIEK(su)DLGR_          | EIEK(1)DLGR                   | 141 | -0.29744  | 73.26  |
| Contig 15684 | 1        | 0.0175021   | _SFLGK(su)ICGR_         | SFLGK(1)ICGR                  | 477 | 1.2169    | 59.35  |
| Contig 15732 | 1        | 0.0334188   | _AIK(su)YYCELRL_        | AIK(1)YYCELRL                 | 203 | -0.40158  | 46.001 |
| Contig 15732 | 1        | 0.00118064  | _SENLEK(su)QCLAK_       | SENLEK(1)QCLAK                | 195 | 0.77881   | 70.942 |
| Contig 7396  | 1        | 0.00890464  | _LEAK(su)TVYGALR_       | LEAK(1)TVYGALR                | 160 | 2.7851    | 61.344 |
| Contig 2798  | 1        | 0.000690841 | _AQVLDSEGK(su)R_        | AQVLDSEGK(1)R                 | 185 | 0.32761   | 85.355 |
| Contig 2798  | 1        | 0.0291164   | _IVPEK(su)IAYVVER_      | IVPEK(1)IAYVVER               | 19  | -1.0764   | 45.28  |
| Contig 15920 | 1        | 0.0296311   | _FVIFYDEK(su)K_         | FVIFYDEK(1)K                  | 236 | 1.0816    | 44.349 |
| Contig 1604  | 1        | 0.00193186  | _K(su)LEPTPGDMVR_       | K(1)LEPTPGDMVR                | 335 | 3.1715    | 63.624 |
| Contig 25574 | 1        | 0.0182355   | _EDLLAK(su)PENIR_       | EDLLAK(1)PENIR                | 698 | 0.72888   | 53.237 |
| Contig 16402 | 1        | 0.00197345  | _ETLQQNK(su)ILK_        | ETLQQNK(1)ILK                 | 382 | -0.44736  | 73.233 |
| Contig 16402 | 1        | 0.00287083  | _VEK(su)VVVSDR_         | VEK(1)VVVSDR                  | 560 | 0.12013   | 83.883 |
| Contig 19420 | 1        | 0.00181613  | _EVAQQIESINK(su)K_      | EVAQQIESINK(1)K               | 44  | 0.615     | 58.172 |
| Contig 19420 | 1        | 0.0106746   | _YHVGK(su)IGK_          | YHVGK(1)IGK                   | 89  | 0.95394   | 70.69  |

|             |          |             |                                  |                                  |     |           |        |
|-------------|----------|-------------|----------------------------------|----------------------------------|-----|-----------|--------|
| Contig16825 | 1        | 0.00000718  | _DGPADTTALAK(su)WR_              | DGPADTTALAK(1)WR                 | 120 | -0.42387  | 96.745 |
| Contig16825 | 1        | 0.00255909  | _WAFK(su)LLQR_                   | WAFK(1)LLQR                      | 302 | -0.60582  | 91.626 |
| Contig39307 | 1        | 0.00090625  | _MEK(su)FYWAPTR_                 | MEK(1)FYWAPTR                    | 309 | 1.3513    | 79.659 |
| Contig19420 | 1        | 1.82E-08    | _AASANPNK(su)LHIGDVAIPR_         | AASANPNK(1)LHIGDVAIPR            | 136 | -0.1539   | 97.235 |
| Contig19420 | 1        | 0.0253824   | _CLEQQPK(su)IK_                  | CLEQQPK(1)IK                     | 248 | -0.68899  | 51.949 |
| Contig16895 | 1        | 0.000233179 | _EVAQGIK(su)SINK_                | EVAQGIK(1)SINK                   | 41  | 0.76878   | 85.813 |
| Contig19420 | 1        | 0.0000363   | _HALSA VGEMFK(su)R_              | HALSA VGEMFK(1)R                 | 338 | -0.2622   | 81.92  |
| Contig19420 | 1        | 0.00017768  | _IEK(su)GSSANIYVNNEA YR_         | IEK(1)GSSANIYVNNEA YR            | 254 | 0.63967   | 68.576 |
| Contig19420 | 1        | 0.0183306   | _IENVELDK(su)CLGK_               | IENVELDK(1)CLGK                  | 234 | -0.4337   | 51.726 |
| Contig19420 | 1        | 0.0000473   | _SEK(su)NM(ox)AFLALR_            | SEK(1)NMAFLALR                   | 295 | -1.091    | 105.98 |
| Contig16920 | 1        | 0.0191136   | _NDNNIVLK(su)TEGK_               | NDNNIVLK(1)TEGK                  | 281 | 0.94722   | 53.034 |
| Contig30441 | 1        | 0.000272558 | _GQLEEEK(su)GGIK_                | GQLEEEK(1)GGIK                   | 282 | -0.46078  | 86.014 |
| Contig17332 | 1        | 0.0020169   | _ALTYPVK(su)LIAK_                | ALTYPVK(1)LIAK                   | 523 | 0.29923   | 67.704 |
| Contig17332 | 1        | 0.00284302  | _LAAK(su)VDAIR_                  | LAAK(1)VDAIR                     | 494 | 0.65631   | 85.862 |
| Contig454   | 1        | 0.0252385   | _GK(su)FDES_                     | GK(1)FDES                        | 12  | -1.3177   | 62.659 |
| Contig43032 | 1        | 0.00992143  | _SVITALK(su)R_                   | SVITALK(1)R                      | 264 | -0.45627  | 73.248 |
| Contig35544 | 1        | 0.0128083   | _TSVDILK(su)VGGYK_               | TSVDILK(1)VGGYK                  | 160 | 0.55484   | 58.172 |
| Contig17831 | 1        | 0.0236984   | _AHIALHDK(su)GK_                 | AHIALHDK(1)GK                    | 26  | -0.034842 | 54.198 |
| Contig17880 | 1        | 0.0106531   | _ASHLLIK(su)HQGSR_               | ASHLLIK(1)HQGSR                  | 14  | 0.55496   | 58.098 |
| Contig17946 | 1        | 0.0362697   | _YYM(ox)LGGK(su)GGVKG_           | YYMLGGK(1)GGVKG                  | 11  | -1.0798   | 46.796 |
| Contig18033 | 1        | 0.000129531 | _GADLQVLSAK(su)LAADK_            | GADLQVLSAK(1)LAADK               | 129 | 2.3846    | 74.296 |
| Contig18033 | 1        | 0.0213239   | _ILLEDVK(su)K_                   | ILLEDVK(1)K                      | 52  | 0.59737   | 58.981 |
| Contig18033 | 1        | 0.00101746  | _LA VEA WGLK(su)NCTQR_           | LA VEA WGLK(1)NCTQR              | 295 | -0.66078  | 64.104 |
| Contig18033 | 0.999416 | 0.0191489   | _SPA VPALTK(su)ILLEDVKK_         | SPA VPALTK(0.999)ILLEDVK(0.001)K | 45  | 0.28897   | 63.374 |
| Contig18033 | 1        | 0.00180809  | _VAGK(su)VFR_                    | VAGK(1)VFR                       | 344 | 0.40594   | 121.68 |
| Contig18033 | 1        | 0.0376553   | _VK(su)A VCIVHNETA TGVTNNLAA VR_ | VK(1)A VCIVHNETA TGVTNNLAA VR    | 139 | -1.4083   | 49.66  |
| Contig18104 | 1        | 0.00858278  | _QLSYTFK(su)R_                   | QLSYTFK(1)R                      | 290 | -0.66135  | 71.501 |
| Contig24498 | 1        | 0.0000746   | _YLLYK(su)DVNR_                  | YLLYK(1)DVNR                     | 280 | 0.52585   | 117.89 |
| Contig18557 | 1        | 0.0000193   | _VICQGITGK(su)NGTFHTEQAIEYGTK_   | VICQGITGK(1)NGTFHTEQAIEYGTK      | 55  | -0.89348  | 79.942 |
| Contig18880 | 1        | 0.00360583  | _SPNFA GVK(su)ECVGNDR_           | SPNFA GVK(1)ECVGNDR              | 216 | -0.62904  | 57.288 |
| Contig1890  | 1        | 0.000856413 | _DYNPEQNK(su)DNVLAR_             | DYNPEQNK(1)DNVLAR                | 22  | 1.3228    | 64.104 |
| Contig19607 | 1        | 0.000689917 | _VK(su)FLDDQNR_                  | VK(1)FLDDQNR                     | 29  | 1.062     | 101.65 |
| Contig19663 | 1        | 0.000575297 | _TTFLSDPEVK(su)R_                | TTFLSDPEVK(1)R                   | 173 | 0.84657   | 72.531 |
| Contig19753 | 1        | 0.00823713  | _IIK(su)VTGPR_                   | IIK(1)VTGPR                      | 26  | -0.016043 | 73.665 |
| Contig2068  | 1        | 0.00188303  | _SK(su)AGIPSLPR_                 | SK(1)AGIPSLPR                    | 280 | -0.34661  | 78.342 |
| Contig2087  | 1        | 0.0157808   | _NTGVK(su)PEILK_                 | NTGVK(1)PEILK                    | 591 | 1.4251    | 58.743 |
| Contig2087  | 1        | 2.89E-15    | _NVGK(su)AITSLPETFNPHR_          | NVGK(1)AITSLPETFNPHR             | 600 | -0.39182  | 121.99 |

|             |   |             |                         |                      |     |          |        |
|-------------|---|-------------|-------------------------|----------------------|-----|----------|--------|
| Contig20924 | 1 | 0.00452089  | _FDALLK(su)EAK_         | FDALLK(1)EAK         | 105 | 1.2834   | 76.282 |
| Contig20924 | 1 | 0.00339869  | _K(su)EFLNLR_           | K(1)EFLNLR           | 32  | 0.85883  | 111.04 |
| Contig20924 | 1 | 0.00520107  | _TYEEVK(su)R_           | TYEEVK(1)R           | 45  | 0.61639  | 91.906 |
| Contig21087 | 1 | 0.000334213 | _GVVESLK(su)IITR_       | GVVESLK(1)IITR       | 178 | 3.2261   | 83.045 |
| Contig21087 | 1 | 0.0131891   | _K(su)TDGLFLQCCR_       | K(1)TDGLFLQCCR       | 215 | -1.0916  | 47.894 |
| Contig21087 | 1 | 0.00150885  | _VAEYAFHYAK(su)THGR_    | VAEYAFHYAK(1)THGR    | 197 | 1.269    | 62.162 |
| Contig21171 | 1 | 1.75E-08    | _GLSLIGEDVK(su)ILAR_    | GLSLIGEDVK(1)ILAR    | 476 | 0.27444  | 111.79 |
| Contig21171 | 1 | 9.25E-08    | _LNAIQEASGGK(su)R_      | LNAIQEASGGK(1)R      | 406 | 0.49644  | 125.97 |
| Contig21171 | 1 | 0.00518624  | _VDK(su)LMELR_          | VDK(1)LMELR          | 388 | -0.23666 | 79.893 |
| Contig21350 | 1 | 0.0331093   | _ASK(su)QVYNISGSR_      | ASK(1)QVYNISGSR      | 287 | 1.2556   | 45.28  |
| Contig21422 | 1 | 0.00000066  | _SLSAISA EVK(su)ELADK_  | SLSAISA EVK(1)ELADK  | 411 | -0.34938 | 96.673 |
| Contig21609 | 1 | 0.000961914 | _A VVA K(su)NLQNR_      | A VVA K(1)NLQNR      | 240 | 0.59434  | 83.948 |
| Contig21709 | 1 | 0.0356247   | _SIPTVMLFK(su)SGEK_     | SIPTVMLFK(1)SGEK     | 163 | 0.27797  | 42.317 |
| Contig2176  | 1 | 0.00112255  | _VIK(su)VVSDR_          | VIK(1)VVSDR          | 88  | -0.51995 | 113.26 |
| Contig2176  | 1 | 0.0209655   | _VLDQK(su)FGIHK_        | VLDQK(1)FGIHK        | 181 | 0.29048  | 53.751 |
| Contig21854 | 1 | 0.00659187  | _IAGLEVK(su)R_          | IAGLEVK(1)R          | 218 | -0.79547 | 81.296 |
| Contig21943 | 1 | 0.0186404   | _YLAEFK(su)TGNER_       | YLAEFK(1)TGNER       | 139 | 1.4202   | 52.247 |
| Contig22424 | 1 | 0.00310806  | _ASGLK(su)PIVDDDK_      | ASGLK(1)PIVDDDK      | 537 | -1.0379  | 78.848 |
| Contig22170 | 1 | 0.0033155   | _LAK(su)VDLGR_          | LAK(1)VDLGR          | 526 | -0.79023 | 91.318 |
| Contig2229  | 1 | 0.0179288   | _FTEK(su)AIK_           | FTEK(1)AIK           | 99  | 0.076195 | 68.915 |
| Contig22408 | 1 | 0.00859537  | _DHIVK(su)GILIGLR_      | DHIVK(1)GILIGLR      | 470 | -0.92488 | 59.265 |
| Contig22504 | 1 | 0.00180931  | _EIA QDFK(su)TDLR_      | EIA QDFK(1)TDLR      | 80  | -2.958   | 66.267 |
| Contig22710 | 1 | 0.00409923  | _GK(su)GVYQFTNK_        | GK(1)GVYQFTNK        | 72  | 0.3524   | 66.92  |
| Contig23147 | 1 | 0.000301429 | _PGTFK(su)QTTL CIR_     | PGTFK(1)QTTL CIR     | 285 | 0.33427  | 72.29  |
| Contig23168 | 1 | 0.0102512   | _AMK(su)QVAGK_          | AMK(1)QVAGK          | 159 | -1.1602  | 72.789 |
| Contig23168 | 1 | 0.0344815   | _VGSAA QMK(su)AM(ox)K_  | VGSAA QMK(1)AMK      | 156 | -1.0789  | 50.353 |
| Contig23293 | 1 | 0.00000334  | _VCAA ALNPVDFK(su)R_    | VCAA ALNPVDFK(1)R    | 91  | -0.71718 | 92.856 |
| Contig6210  | 1 | 0.01398     | _MVLLK(su)GVDER_        | MVLLK(1)GVDER        | 384 | 0.48049  | 58.699 |
| Contig23896 | 1 | 0.0222101   | _LSK(su)VLDVYEER_       | LSK(1)VLDVYEER       | 143 | 1.1305   | 49.448 |
| Contig23929 | 1 | 0.00186468  | _HEEIVDLA K(su)K_       | HEEIVDLA K(1)K       | 295 | -0.52568 | 72.607 |
| Contig23978 | 1 | 0.017878    | _VVVIK(su)ELK_          | VVVIK(1)ELK          | 96  | -0.93199 | 62.546 |
| Contig26568 | 1 | 0.0000288   | _TLA K(su)VVGSEEEA K_   | TLA K(1)VVGSEEEA K   | 23  | 0.47588  | 89.231 |
| Contig24406 | 1 | 0.0333016   | _MEGK(su)LTGSGHSIA AAR_ | MEGK(1)LTGSGHSIA AAR | 778 | -0.84155 | 46.892 |
| Contig24557 | 1 | 0.000121008 | _HYIQDPPTVEK(su)CHELSK_ | HYIQDPPTVEK(1)CHELSK | 54  | 0.038971 | 66.826 |
| Contig24602 | 1 | 0.00102436  | _EPILCK(su)NVPR_        | EPILCK(1)NVPR        | 117 | 1.4245   | 80.231 |
| Contig24602 | 1 | 0.00599536  | _LK(su)LVFPEK_          | LK(1)LVFPEK          | 155 | 0.043552 | 69.275 |
| Contig24949 | 1 | 0.00115507  | _LEQETLK(su)WCR_        | LEQETLK(1)WCR        | 270 | -1.3475  | 74.841 |

|             |   |             |                                   |                                |     |           |        |
|-------------|---|-------------|-----------------------------------|--------------------------------|-----|-----------|--------|
| Contig2510  | 1 | 0.00239228  | _TASK(su)SVSSSPW YGPDR_           | TASK(1)SVSSSPW YGPDR           | 46  | 0.72123   | 63.682 |
| Contig25285 | 1 | 0.0000279   | _ELAK(su)EGINAEVINLR_             | ELAK(1)EGINAEVINLR             | 272 | -0.03999  | 85.909 |
| Contig3062  | 1 | 0.000468099 | _IISSIEQK(su)EESR_                | IISSIEQK(1)EESR                | 77  | -0.11957  | 71.176 |
| Contig25407 | 1 | 0.000760316 | _EK(su)GIFTNVTSPSAK_              | EK(1)GIFTNVTSPSAK              | 287 | -0.9437   | 69.261 |
| Contig25407 | 1 | 0.00998358  | _TIAFK(su)VR_                     | TIAFK(1)VR                     | 90  | 0.65188   | 76.847 |
| Contig25407 | 1 | 0.00158226  | _TQVA YGSK(su)NEIIR_              | TQVA YGSK(1)NEIIR              | 348 | 0.091215  | 61.409 |
| Contig25407 | 1 | 0.00324284  | _VIK(su)NVDDR_                    | VIK(1)NVDDR                    | 335 | 0.3037    | 89.698 |
| Contig25601 | 1 | 0.00147889  | _GLCGFNMM VLK(su)R_               | GLCGFNMM VLK(1)R               | 143 | -0.46222  | 57.175 |
| Contig25672 | 1 | 6.94E-11    | _GILAM(ox)DESNA TCGK(su)R_        | GILAMDESNA TCGK(1)R            | 412 | -0.3808   | 111.12 |
| Contig25672 | 1 | 0.000669105 | _TAK(su)TVASPGR_                  | TAK(1)TVASPGR                  | 391 | -0.40179  | 91.658 |
| Contig25847 | 1 | 0.0167421   | _ILDVEQCK(su)ELK_                 | ILDVEQCK(1)ELK                 | 258 | 0.69626   | 52.391 |
| Contig25847 | 1 | 0.0337507   | _K(su)NEVFTK_                     | K(1)NEVFTK                     | 113 | 0.55173   | 58.917 |
| Contig25868 | 1 | 0.000439528 | _EVANK(su)LER_                    | EVANK(1)LER                    | 188 | -1.9549   | 123.98 |
| Contig25868 | 1 | 0.0000962   | _IENVGLDK(su)CLGR_                | IENVGLDK(1)CLGR                | 234 | -1.2386   | 79.492 |
| Contig25940 | 1 | 0.00172361  | _NDA VGTIK(su)HVEK_               | NDA VGTIK(1)HVEK               | 232 | -0.16874  | 64.827 |
| Contig26084 | 1 | 0.0242014   | _TPPLK(su)LSK_                    | TPPLK(1)LSK                    | 93  | -3.2702   | 59.368 |
| Contig26567 | 1 | 5.07E-08    | _SMTQHNVGALLVVK(su)PGA EK_        | SMTQHNVGALLVVK(1)PGA EK        | 98  | 1.1012    | 91.589 |
| Contig26788 | 1 | 0.0282201   | _DGVYPEK(su)ANPGR_                | DGVYPEK(1)ANPGR                | 165 | -0.86203  | 48.568 |
| Contig26788 | 1 | 0.0234643   | _FK(su)JINYQFYR_                  | FK(1)JINYQFYR                  | 138 | -0.076226 | 49.715 |
| Contig26853 | 1 | 0.0173166   | _VPAEVIESIK(su)R_                 | VPAEVIESIK(1)R                 | 101 | -1.52     | 50.354 |
| Contig26908 | 1 | 0.00185238  | _VLVDQK(su)ISTIK_                 | VLVDQK(1)ISTIK                 | 242 | -0.54436  | 63.091 |
| Contig27115 | 1 | 0.00467872  | _LK(su)HGEALVQNEGSDISK_           | LK(1)HGEALVQNEGSDISK           | 38  | 0.5175    | 60.062 |
| Contig27115 | 1 | 0.0235194   | _LPK(su)NVVYR_                    | LPK(1)NVVYR                    | 146 | -1.5083   | 57.177 |
| Contig27136 | 1 | 0.0000199   | _SLFK(su)GAGANILR_                | SLFK(1)GAGANILR                | 288 | 0.039803  | 94.465 |
| Contig27136 | 1 | 0.00000972  | _TIK(su)SDGVA GLYR_               | TIK(1)SDGVA GLYR               | 184 | -0.62128  | 103.21 |
| Contig27136 | 1 | 0.0169239   | _VK(su)LLIQNQDEMLK_               | VK(1)LLIQNQDEMLK               | 49  | -0.95739  | 50.088 |
| Contig36350 | 1 | 0.0128339   | _SQSPWK(su)R_                     | SQSPWK(1)R                     | 47  | 0.090914  | 73.616 |
| Contig27558 | 1 | 0.00791819  | _VLSVVK(su)SFPK_                  | VLSVVK(1)SFPK                  | 58  | -0.18507  | 64.82  |
| Contig27743 | 1 | 0.0336938   | _VPNTK(su)NLGLEEVGVK_             | VPNTK(1)NLGLEEVGVK             | 361 | 0.31643   | 44.252 |
| Contig27826 | 1 | 0.00753376  | _ALNDHHVLEGTLLK(su)PNM VTPGSDAPK_ | ALNDHHVLEGTLLK(1)PNM VTPGSDAPK | 225 | 2.3247    | 60.95  |
| Contig30157 | 1 | 0.000177313 | _LVAQK(su)GLHLIR_                 | LVAQK(1)GLHLIR                 | 449 | -1.536    | 88.495 |
| Contig28049 | 1 | 0.0105286   | _AMK(su)FSVSPVVR_                 | AMK(1)FSVSPVVR                 | 482 | 1.0906    | 60.255 |
| Contig28157 | 1 | 0.0244983   | _GYVASDSK(su)NDPAK_               | GYVASDSK(1)NDPAK               | 318 | 0.21781   | 51.726 |
| Contig28157 | 1 | 0.000537363 | _QTVA VGVK(su)A VEK_              | QTVA VGVK(1)A VEK              | 427 | 0.16708   | 72.321 |
| Contig28177 | 1 | 0.0312374   | _EPAGEDRPSDK(su)PR_               | EPAGEDRPSDK(1)PR               | 59  | 0.74976   | 55.261 |
| Contig28454 | 1 | 0.028645    | _ELK(su)LDLEK_                    | ELK(1)LDLEK                    | 458 | 0.25004   | 54.722 |
| Contig28856 | 1 | 0.0000388   | _TALSDEYFVK(su)R_                 | TALSDEYFVK(1)R                 | 409 | -0.49339  | 108.7  |



|             |          |             |                                     |                              |     |          |        |
|-------------|----------|-------------|-------------------------------------|------------------------------|-----|----------|--------|
| Contig29215 | 1        | 0.0364627   | _EFEK(su)EAK_                       | EFEK(1)EAK                   | 343 | 0.20248  | 56.122 |
| Contig29215 | 1        | 0.003042    | _SPAYYK(su)R_                       | SPAYYK(1)R                   | 248 | -0.64209 | 114.02 |
| Contig32342 | 1        | 0.01046     | _ESGLYGICGDK(su)DMR_                | ESGLYGICGDK(1)DMR            | 260 | -1.7407  | 53.3   |
| Contig29422 | 1        | 0.009417    | _IFLEDGHQIACAQSFAK(su)NM(oX)GLYGQR_ | IFLEDGHQIACAQSFAK(1)NMGLYGQR | 271 | -1.1268  | 60.735 |
| Contig29951 | 1        | 0.00533772  | _DDELLATDTK(su)SVPR_                | DDELLATDTK(1)SVPR            | 202 | 0.73762  | 56.569 |
| Contig29956 | 1        | 0.00670255  | _IAGLDVK(su)R_                      | IAGLDVK(1)R                  | 223 | -0.43538 | 81.296 |
| Contig29956 | 1        | 0.00151141  | _NPK(su)VIENSEGAR_                  | NPK(1)VIENSEGAR              | 82  | 0.78357  | 66.267 |
| Contig29956 | 1        | 0.0296317   | _SCLK(su)DAGVTVK_                   | SCLK(1)DAGVTVK               | 376 | -1.7072  | 49.448 |
| Contig29956 | 1        | 0.000104096 | _SESIDLSK(su)DR_                    | SESIDLSK(1)DR                | 305 | -0.43938 | 113.93 |
| Contig29956 | 1        | 0.000995617 | _TKEPCK(su)SCLK_                    | TKEPCK(1)SCLK                | 372 | -0.85225 | 91.549 |
| Contig3071  | 1        | 0.00768938  | _EK(su)VVIPK_                       | EK(1)VVIPK                   | 419 | 1.0649   | 82.671 |
| Contig3071  | 1        | 0.0054794   | _TCEK(su)SPIPR_                     | TCEK(1)SPIPR                 | 405 | 0.45731  | 70.908 |
| Contig30828 | 1        | 0.0110055   | _NFHK(su)FLEVR_                     | NFHK(1)FLEVR                 | 216 | -1.5298  | 61.78  |
| Contig31013 | 1        | 0.00192462  | _AEFLK(su)AVENNR_                   | AEFLK(1)AVENNR               | 673 | -0.4666  | 66.56  |
| Contig31013 | 1        | 0.00720821  | _IADVVK(su)LR_                      | IADVVK(1)LR                  | 349 | -3.0423  | 75.738 |
| Contig31013 | 1        | 0.0322916   | _MYK(su)TLLGK_                      | MYK(1)TLLGK                  | 394 | -0.22008 | 53.775 |
| Contig9786  | 1        | 0.00774013  | _VEEISK(su)GVGDK_                   | VEEISK(1)GVGDK               | 79  | -0.1294  | 61.932 |
| Contig6895  | 1        | 0.00754071  | _LNVFK(su)PDK_                      | LNVFK(1)PDK                  | 169 | 0.39132  | 73.573 |
| Contig31735 | 0.857382 | 0.00345792  | _K(su)NKFVEEWGAAR_                  | K(0.857)NK(0.143)FVEEWGAAR   | 9   | 0.4871   | 73.632 |
| Contig31735 | 1        | 0.000416526 | _NK(su)FVEEWGAAR_                   | NK(1)FVEEWGAAR               | 11  | 1.9641   | 77.744 |
| Contig3195  | 1        | 0.0000516   | _HVIGEDNQFIGK(su)K_                 | HVIGEDNQFIGK(1)K             | 167 | 0.22772  | 69.815 |
| Contig32159 | 1        | 0.0159958   | _TIQDEINDLK(su)K_                   | TIQDEINDLK(1)K               | 171 | -0.5233  | 48.948 |
| Contig32510 | 1        | 0.00240926  | _NIWK(su)VINWK_                     | NIWK(1)VINWK                 | 210 | -0.85972 | 83.168 |
| Contig32510 | 1        | 0.00197665  | _NLAPVK(su)EGGGEPPK_                | NLAPVK(1)EGGGEPPK            | 111 | 0.099055 | 65.895 |
| Contig32510 | 1        | 0.0244972   | _NVRPDYLK(su)NIWK_                  | NVRPDYLK(1)NIWK              | 206 | 1.1389   | 57.401 |
| Contig32572 | 1        | 0.000358862 | _GLLGK(su)NITER_                    | GLLGK(1)NITER                | 89  | 0.22661  | 94.692 |
| Contig32572 | 1        | 0.000150004 | _VLDVYDK(su)R_                      | VLDVYDK(1)R                  | 150 | -0.7542  | 127.02 |
| Contig32572 | 1        | 0.00469617  | _YIAQK(su)YETR_                     | YIAQK(1)YETR                 | 77  | 0.38432  | 72.243 |
| Contig38810 | 1        | 0.0245236   | _GSDLSGK(su)DFSGK_                  | GSDLSGK(1)DFSGK              | 109 | 0.2405   | 53.448 |
| Contig32590 | 1        | 0.00334647  | _SLDEVIK(su)R_                      | SLDEVIK(1)R                  | 460 | 0.12344  | 94.114 |
| Contig3264  | 1        | 0.0252177   | _VEK(su)LGTELK_                     | VEK(1)LGTELK                 | 67  | 2.0279   | 55.084 |
| Contig32731 | 0.998905 | 0.00385664  | _FYKEEEK(su)NDPEFAK_                | FYK(0.001)EEEK(0.999)NDPEFAK | 188 | 0.40361  | 65.895 |
| Contig32731 | 0.999962 | 0.0000872   | _GVTPK(su)YSLKPLVPR_                | GVTPK(1)YSLKPLVPR            | 133 | 0.51806  | 89.43  |
| Contig32731 | 1        | 0.000947636 | _YSLK(su)PLVPR_                     | YSLK(1)PLVPR                 | 137 | 0.86098  | 99.442 |
| Contig33055 | 1        | 0.00106795  | _AMK(su)QVCGSLK_                    | AMK(1)QVCGSLK                | 390 | -0.92966 | 83.862 |
| Contig33055 | 1        | 0.00233562  | _GK(su)LTNEIEMK_                    | GK(1)LTNEIEMK                | 493 | 0.23785  | 72.2   |
| Contig33055 | 1        | 0.00223765  | _ITDYSTDLLK(su)VDEIGR_              | ITDYSTDLLK(1)VDEIGR          | 19  | 0.21916  | 59.709 |

|             |          |             |                         |                                 |     |            |        |
|-------------|----------|-------------|-------------------------|---------------------------------|-----|------------|--------|
| Contig33055 | 1        | 0.0214019   | _LTEVLK(su)QPQYSPLPIEK_ | LTEVLK(1)QPQYSPLPIEK            | 435 | -0.45974   | 45.384 |
| Contig33055 | 1        | 0.0124135   | _M(ox)ELTTLLEK(su)R_    | MELTTLLEK(1)R                   | 9   | -1.3696    | 53.237 |
| Contig33055 | 1        | 0.000176024 | _TGSIVDVPVGK(su)ALLGR_  | TGSIVDVPVGK(1)ALLGR             | 96  | -0.095752  | 74.853 |
| Contig33055 | 1        | 0.0000433   | _VGSAAQLK(su)AM(ox)K_   | VGSAAQLK(1)AMK                  | 387 | 0.065175   | 113.93 |
| Contig33154 | 1        | 0.000989454 | _AAAEK(su)IFSAK_        | AAAEK(1)IFSAK                   | 113 | -0.90527   | 85.355 |
| Contig33154 | 1        | 0.000297036 | _AK(su)TLSGPVSSPK_      | AK(1)TLSGPVSSPK                 | 39  | 0.53052    | 78.324 |
| Contig33154 | 1        | 0.000027    | _HK(su)EHIAA YGEGNER_   | HK(1)EHIAA YGEGNER              | 279 | 0.50337    | 86.498 |
| Contig34414 | 1        | 0.00432016  | _WAFELK(su)R_           | WAFELK(1)R                      | 280 | 1.4333     | 84.568 |
| Contig3457  | 1        | 0.00892758  | _VEK(su)HIQDAISK_       | VEK(1)HIQDAISK                  | 380 | 1.152      | 60.509 |
| Contig34617 | 1        | 0.0220906   | _NLGK(su)CR_            | NLGK(1)CR                       | 117 | -1.3335    | 64.803 |
| Contig34627 | 1        | 0.00740656  | _FK(su)DIFEEYEK_        | FK(1)DIFEEYEK                   | 287 | 0.34295    | 56.205 |
| Contig34627 | 1        | 0.00010776  | _MTK(su)DLAILVHCSR_     | MTK(1)DLAILVHCSR                | 437 | -0.0085083 | 75.911 |
| Contig34715 | 1        | 0.00297136  | _LPPK(su)AISAARK_       | LPPK(1)AISAARK                  | 400 | -0.59393   | 72.2   |
| Contig34759 | 1        | 0.036719    | _IK(su)GYPLWPDANK_      | IK(1)GYPLWPDANK                 | 357 | 0.0050462  | 40.767 |
| Contig34759 | 1        | 0.0113868   | _LEICTEK(su)K_          | LEICTEK(1)K                     | 58  | -1.1157    | 67.897 |
| Contig34759 | 1        | 0.00317724  | _SQGEIPTTWK(su)R_       | SQGEIPTTWK(1)R                  | 237 | -0.61905   | 58.172 |
| Contig34873 | 1        | 0.0188736   | _ISK(su)AFFR_           | ISK(1)AFFR                      | 133 | -0.38429   | 67.344 |
| Contig34873 | 1        | 0.00329917  | _SIK(su)SIQK_           | SIK(1)SIQK                      | 60  | 0.25603    | 97.602 |
| Contig35075 | 1        | 0.0337975   | _INPDSAK(su)GYK_        | INPDSAK(1)GYK                   | 203 | 0.62808    | 48.981 |
| Contig35181 | 1        | 0.0185229   | _ITTLVK(su)AANVK_       | ITTLVK(1)AANVK                  | 32  | -0.95034   | 56.404 |
| Contig35287 | 1        | 0.000364851 | _ENNFK(su)QPGER_        | ENNFK(1)QPGER                   | 429 | 0.26119    | 91.549 |
| Contig35316 | 1        | 0.00150181  | _THGGIDVIK(su)K_        | THGGIDVIK(1)K                   | 267 | -0.11532   | 78.098 |
| Contig39434 | 1        | 0.00809697  | _GILAVDESNA TCGK(su)R_  | GILAVDESNA TCGK(1)R             | 78  | 1.1546     | 47.037 |
| Contig39434 | 1        | 0.00264229  | _SAEYYK(su)QGAR_        | SAEYYK(1)QGAR                   | 175 | 0.92745    | 70.028 |
| Contig35702 | 1        | 0.00073221  | _GIPTFEK(su)TQQEGK_     | GIPTFEK(1)TQQEGK                | 113 | 1.2718     | 67.997 |
| Contig35859 | 1        | 0.0000408   | _EK(su)AGLYSDADR_       | EK(1)AGLYSDADR                  | 103 | -0.043962  | 113.38 |
| Contig35859 | 1        | 0.00121575  | _EK(su)VTIDPDDPNA VSR_  | EK(1)VTIDPDDPNA VSR             | 79  | 0.77184    | 64.52  |
| Contig35859 | 0.974544 | 0.0265603   | _K(su)EKVTIDPDDPNA VSR_ | K(0.975)EK(0.025)VTIDPDDPNA VSR | 77  | -0.29395   | 57.197 |
| Contig35859 | 1        | 0.0000586   | _VK(su)SGLEDHLGAEK_     | VK(1)SGLEDHLGAEK                | 140 | 0.086687   | 83.358 |
| Contig35859 | 1        | 0.00012527  | _YEK(su)QLELDVAK_       | YEK(1)QLELDVAK                  | 202 | 0.62865    | 88.155 |
| Contig35931 | 1        | 0.00817408  | _LIVIDYK(su)PMR_        | LIVIDYK(1)PMR                   | 109 | 2.1509     | 61.161 |
| Contig36475 | 1        | 0.0397166   | _AEVTASLNQMK(su)K_      | AEVTASLNQMK(1)K                 | 170 | -0.87177   | 42.843 |
| Contig36475 | 1        | 0.0000953   | _LQEEADAILK(su)AAR_     | LQEEADAILK(1)AAR                | 156 | -0.0019618 | 77.185 |
| Contig36589 | 1        | 0.0206574   | _ACSVDA VK(su)YIR_      | ACSVDA VK(1)YIR                 | 103 | -0.80136   | 51.998 |
| Contig3710  | 1        | 0.00064571  | _DVFLEK(su)HGVK_        | DVFLEK(1)HGVK                   | 289 | 1.0815     | 78.401 |
| Contig3710  | 1        | 0.0227747   | _HGVK(su)LGFMSGFIK_     | HGVK(1)LGFMSGFIK                | 293 | -0.69386   | 50.897 |
| Contig3710  | 1        | 0.0206653   | _LNFAEIEK(su)TMSALAK_   | LNFAEIEK(1)TMSALAK              | 359 | -0.58859   | 48.131 |

|             |          |             |                        |                     |     |           |        |
|-------------|----------|-------------|------------------------|---------------------|-----|-----------|--------|
| Contig37760 | 0.999814 | 0.0232073   | _QLEK(su)ELKER_        | QLEK(1)ELKER        | 118 | 0.70333   | 71.692 |
| Contig38639 | 1        | 0.0214151   | _VVK(su)GTA FGGFK_     | VVK(1)GTA FGGFK     | 318 | 0.7817    | 53.567 |
| Contig38899 | 1        | 0.000124963 | _AGFK(su)AIALTVDTPR_   | AGFK(1)AIALTVDTPR   | 150 | 0.95742   | 73.834 |
| Contig38899 | 1        | 0.000338442 | _DVK(su)WLQTITK_       | DVK(1)WLQTITK       | 217 | 0.63902   | 92.611 |
| Contig38899 | 1        | 0.0186428   | _SLSWK(su)DVK_         | SLSWK(1)DVK         | 214 | -0.012829 | 60.91  |
| Contig38987 | 1        | 0.00825288  | _EFLENLK(su)LGEGVK_    | EFLENLK(1)LGEGVK    | 247 | -0.8514   | 56.569 |
| Contig38987 | 1        | 0.00593334  | _LM(ox)K(su)VISDSVK_   | LMK(1)VISDSVK       | 127 | 0.42637   | 70.808 |
| Contig38987 | 1        | 0.000615608 | _MSK(su)SGRPIEPR_      | MSK(1)SGRPIEPR      | 332 | 0.0026157 | 89.9   |
| Contig392   | 1        | 0.00303912  | _IFK(su)IGGLGVK_       | IFK(1)IGGLGVK       | 186 | 0.64485   | 70.908 |
| Contig392   | 1        | 0.00913778  | _IGGLGVK(su)TYR_       | IGGLGVK(1)TYR       | 193 | 0.94022   | 64.82  |
| Contig392   | 1        | 0.00149093  | _TEEGK(su)PLILNVVR_    | TEEGK(1)PLILNVVR    | 89  | -0.98003  | 62.338 |
| Contig40889 | 1        | 0.00202323  | _EIK(su)VECTIPR_       | EIK(1)VECTIPR       | 36  | 0.26842   | 72.2   |
| Contig40889 | 1        | 0.00215885  | _VNAELK(su)TYMTR_      | VNAELK(1)TYMTR      | 367 | -0.5619   | 64.121 |
| Contig4152  | 1        | 0.0212049   | _IAIAK(su)AGYTGK_      | IAIAK(1)AGYTGK      | 238 | 0.37842   | 56.205 |
| Contig41772 | 1        | 0.00878111  | _GMFDK(su)EK_          | GMFDK(1)EK          | 271 | -0.61767  | 79.146 |
| Contig41772 | 1        | 0.0290666   | _M(ox)K(su)EGVLIVNNAR_ | MK(1)EGVLIVNNAR     | 278 | 0.48062   | 49.448 |
| Contig41772 | 1        | 0.0258777   | _VGVFYK(su)ANEYASK_    | VGVFYK(1)ANEYASK    | 42  | -0.20886  | 47.037 |
| Contig41772 | 1        | 0.0123656   | _YAAGVK(su)DMLDK_      | YAAGVK(1)DMLDK      | 353 | -0.86025  | 59.265 |
| Contig41812 | 1        | 0.0176715   | _SCLK(su)EPYK_         | SCLK(1)EPYK         | 33  | -0.76518  | 60.436 |
| Contig41858 | 1        | 0.0205612   | _LVA VGYGK(su)K_       | LVA VGYGK(1)K       | 183 | -0.063805 | 53.756 |
| Contig42134 | 1        | 0.000770501 | _HYK(su)NAFHALSR_      | HYK(1)NAFHALSR      | 148 | -0.48928  | 73.435 |
| Contig42338 | 1        | 0.00276728  | _AILDK(su)SEQK_        | AILDK(1)SEQK        | 256 | 0.76743   | 84.615 |
| Contig42338 | 1        | 0.00116262  | _DK(su)DLAHIESHMK_     | DK(1)DLAHIESHMK     | 157 | 0.62472   | 66.538 |
| Contig42338 | 0.999997 | 0.00346475  | _DKDLAHIESHMK(su)NFK_  | DKDLAHIESHMK(1)NFK  | 167 | 0.20334   | 66.674 |
| Contig42338 | 1        | 0.0025081   | _GK(su)ECIPFLEK_       | GK(1)ECIPFLEK       | 98  | -0.21289  | 69.721 |
| Contig42338 | 1        | 0.0000265   | _K(su)TALYDFHVENGGK_   | K(1)TALYDFHVENGGK   | 41  | 0.45363   | 74.848 |
| Contig42338 | 1        | 0.0127045   | _TIGEITSGGFSPCLK(su)K_ | TIGEITSGGFSPCLK(1)K | 365 | -1.9242   | 49.188 |
| Contig42340 | 1        | 0.0129835   | _EEDLK(su)GFR_         | EEDLK(1)GFR         | 138 | -0.28354  | 66.073 |
| Contig42340 | 1        | 0.0000398   | _HIEK(su)GAA VEA K_    | HIEK(1)GAA VEA K    | 351 | 0.24434   | 116.03 |
| Contig42340 | 1        | 0.0324967   | _TLISGK(su)FPEGWEK_    | TLISGK(1)FPEGWEK    | 384 | 1.4637    | 43.297 |
| Contig42616 | 1        | 0.000200761 | _AVSLVLPQLK(su)GK_     | AVSLVLPQLK(1)GK     | 314 | 1.4019    | 77.062 |
| Contig42616 | 1        | 0.0112161   | _VIK(su)VVSNR_         | VIK(1)VVSNR         | 162 | 1.2744    | 69.812 |
| Contig42964 | 1        | 0.0000868   | _NFNIQK(su)QLGR_       | NFNIQK(1)QLGR       | 70  | 1.2548    | 94.692 |
| Contig4298  | 1        | 0.00830149  | _LSDYIGK(su)K_         | LSDYIGK(1)K         | 115 | 0.13265   | 66.351 |
| Contig43437 | 1        | 0.0011256   | _LK(su)EYSINTK_        | LK(1)EYSINTK        | 56  | 1.4075    | 96.342 |
| Contig43475 | 1        | 0.00361791  | _AQDYK(su)PGSMK_       | AQDYK(1)PGSMK       | 186 | 0.28538   | 61.11  |
| Contig4446  | 1        | 0.00219174  | _GGVHIVK(su)TEK_       | GGVHIVK(1)TEK       | 97  | -0.50174  | 75.387 |

|            |   |             |                          |                       |     |            |        |
|------------|---|-------------|--------------------------|-----------------------|-----|------------|--------|
| Contig4446 | 1 | 0.00104354  | _TEK(su)AEDIAGK_         | TEK(1)AEDIAGK         | 100 | 0.13169    | 83.862 |
| Contig4446 | 1 | 0.0222781   | _K(su)GGT'SIEDLAEK_      | K(1)GGT'SIEDLAEK      | 160 | -0.0070363 | 49.243 |
| Contig4446 | 1 | 0.00276727  | _PVNK(su)VYLCQK_         | PVNK(1)VYLCQK         | 127 | 0.96362    | 67.414 |
| Contig4446 | 1 | 0.0035222   | _QK(su)EIFALR_           | QK(1)EIFALR           | 259 | 0.84656    | 86.794 |
| Contig4667 | 1 | 0.00478836  | _EVLDFK(su)AK_           | EVLDFK(1)AK           | 219 | 0.64348    | 74.464 |
| Contig4938 | 1 | 0.0296884   | _ANSLTDEDIK(su)ALTK_     | ANSLTDEDIK(1)ALTK     | 229 | 0.1694     | 46.68  |
| Contig6045 | 1 | 0.032895    | _GSDWIVNEM(ox)K(su)K_    | GSDWIVNEMK(1)K        | 101 | 0.5783     | 40.015 |
| Contig6724 | 1 | 0.0044231   | _MAFK(su)STR_            | MAFK(1)STR            | 130 | -1.0633    | 91.626 |
| Contig7357 | 1 | 0.0173297   | _TVPK(su)TVENFR_         | TVPK(1)TVENFR         | 56  | -0.29476   | 55.314 |
| Contig7499 | 1 | 0.00163727  | _A VLIDK(su)DQNP_        | A VLIDK(1)DQNP        | 348 | 0.57976    | 69.721 |
| Contig7684 | 1 | 0.000886866 | _FTTFK(su)PLGDR_         | FTTFK(1)PLGDR         | 61  | -0.55004   | 83.499 |
| Contig7684 | 1 | 0.00182109  | _VLIK(su)VQEAEEK_        | VLIK(1)VQEAEEK        | 168 | 2.6826     | 67.385 |
| Contig7916 | 1 | 0.000075    | _AAQLGLK(su)TTCIEK_      | AAQLGLK(1)TTCIEK      | 81  | -1.9811    | 79.875 |
| Contig7916 | 1 | 0.00766146  | _TTCIEK(su)R_            | TTCIEK(1)R            | 87  | 0.075764   | 82.671 |
| Contig7916 | 1 | 0.0029891   | _GIEGLFK(su)K_           | GIEGLFK(1)K           | 157 | 0.23938    | 75.109 |
| Contig7916 | 1 | 0.0000311   | _GLGLEELGVK(su)LDK_      | GLGLEELGVK(1)LDK      | 342 | 0.04487    | 88.101 |
| Contig7916 | 1 | 0.00732566  | _IIAEK(su)ETDK_          | IIAEK(1)ETDK          | 457 | 0.16151    | 68.657 |
| Contig7916 | 1 | 0.00479855  | _SFQK(su)TLEK_           | SFQK(1)TLEK           | 276 | 0.32417    | 83.862 |
| Contig7916 | 1 | 0.00291451  | _MK(su)A VTGLTK_         | MK(1)A VTGLTK         | 143 | -1.3449    | 85.533 |
| Contig8228 | 1 | 0.00397711  | _NAELDPEK(su)R_          | NAELDPEK(1)R          | 219 | 0.13007    | 79.148 |
| Contig8619 | 1 | 0.0031127   | _A VIA K(su)SFER_        | A VIA K(1)SFER        | 803 | -0.49474   | 82.645 |
| Contig8619 | 1 | 0.0292188   | _LLNGEVGPK(su)TIHIPTGEK_ | LLNGEVGPK(1)TIHIPTGEK | 745 | -0.012437  | 49.537 |
| Contig8619 | 1 | 0.00169554  | _NCDNFQVTK(su)ADVEK_     | NCDNFQVTK(1)ADVEK     | 61  | 0.59898    | 60.55  |
| Contig8619 | 1 | 0.00279929  | _YLLK(su)SGLQK_          | YLLK(1)SGLQK          | 488 | 0.68523    | 83.948 |
| Contig8749 | 1 | 0.0358827   | _GQK(su)EYLR_            | GQK(1)EYLR            | 222 | 0.11459    | 56.091 |
| Contig8863 | 1 | 0.0017242   | _HVLK(su)SEGGIR_         | HVLK(1)SEGGIR         | 178 | 0.043877   | 77.662 |
| Contig8976 | 1 | 0.0235044   | _IYENTK(su)TIK_          | IYENTK(1)TIK          | 159 | 0.53429    | 53.751 |
| Contig9227 | 1 | 2E-19       | _ANIK(su)AIQEASESGVK_    | ANIK(1)AIQEASESGVK    | 148 | 0.66851    | 145.43 |
| Contig9268 | 1 | 0.00540166  | _GK(su)IPASEFR_          | GK(1)IPASEFR          | 121 | 0.082543   | 73.233 |
| Contig9515 | 1 | 0.00107676  | _ASCISFK(su)DSACR_       | ASCISFK(1)DSACR       | 81  | -2.0227    | 67.252 |

Table S3. The number of succinylated sites in each succinylated protein.

| Protein     | number of sites |
|-------------|-----------------|
| Contig9786  | 1               |
| Contig9515  | 1               |
| Contig9268  | 1               |
| Contig9227  | 1               |
| Contig8976  | 1               |
| Contig8863  | 1               |
| Contig8749  | 1               |
| Contig8619  | 4               |
| Contig8228  | 1               |
| Contig8119  | 1               |
| Contig7916  | 7               |
| Contig7684  | 2               |
| Contig7499  | 1               |
| Contig7396  | 1               |
| Contig7357  | 1               |
| Contig6895  | 2               |
| Contig6724  | 1               |
| Contig6210  | 1               |
| Contig6045  | 1               |
| Contig5689  | 2               |
| Contig5591  | 1               |
| Contig4938  | 1               |
| Contig4667  | 1               |
| Contig454   | 1               |
| Contig4446  | 5               |
| Contig43475 | 1               |
| Contig43437 | 1               |
| Contig43032 | 1               |
| Contig4298  | 1               |
| Contig42964 | 1               |
| Contig42616 | 2               |
| Contig42340 | 3               |
| Contig42338 | 6               |
| Contig42134 | 1               |
| Contig41858 | 1               |
| Contig41812 | 1               |
| Contig41772 | 4               |
| Contig4152  | 1               |
| Contig40889 | 2               |
| Contig39434 | 2               |
| Contig39307 | 1               |
| Contig392   | 3               |
| Contig38987 | 3               |

|             |   |
|-------------|---|
| Contig38899 | 3 |
| Contig38810 | 1 |
| Contig38639 | 1 |
| Contig37760 | 1 |
| Contig3710  | 3 |
| Contig36589 | 1 |
| Contig36475 | 2 |
| Contig36350 | 1 |
| Contig35931 | 1 |
| Contig35859 | 5 |
| Contig3575  | 1 |
| Contig35702 | 1 |
| Contig35544 | 1 |
| Contig35316 | 1 |
| Contig35287 | 1 |
| Contig35181 | 1 |
| Contig35075 | 1 |
| Contig34873 | 2 |
| Contig34759 | 3 |
| Contig34715 | 1 |
| Contig34627 | 2 |
| Contig34617 | 1 |
| Contig3457  | 1 |
| Contig34414 | 1 |
| Contig33154 | 3 |
| Contig33055 | 7 |
| Contig32731 | 3 |
| Contig3264  | 1 |
| Contig32590 | 1 |
| Contig32572 | 3 |
| Contig32510 | 3 |
| Contig32342 | 1 |
| Contig32159 | 1 |
| Contig3195  | 1 |
| Contig31735 | 2 |
| Contig31013 | 3 |
| Contig30828 | 1 |
| Contig3071  | 2 |
| Contig3062  | 1 |
| Contig30441 | 1 |
| Contig30157 | 1 |
| Contig29956 | 5 |
| Contig29951 | 1 |
| Contig29422 | 1 |
| Contig29215 | 2 |
| Contig28856 | 1 |

|             |   |
|-------------|---|
| Contig28454 | 1 |
| Contig28177 | 1 |
| Contig28157 | 2 |
| Contig28049 | 1 |
| Contig2798  | 2 |
| Contig27826 | 1 |
| Contig27743 | 1 |
| Contig27558 | 1 |
| Contig27136 | 3 |
| Contig27115 | 2 |
| Contig26908 | 1 |
| Contig26853 | 1 |
| Contig26788 | 2 |
| Contig26568 | 1 |
| Contig26567 | 1 |
| Contig26084 | 1 |
| Contig25940 | 1 |
| Contig25868 | 1 |
| Contig25847 | 2 |
| Contig25672 | 2 |
| Contig25601 | 1 |
| Contig25574 | 1 |
| Contig25407 | 4 |
| Contig25285 | 1 |
| Contig2510  | 1 |
| Contig24949 | 1 |
| Contig24602 | 2 |
| Contig24557 | 1 |
| Contig24498 | 1 |
| Contig24406 | 1 |
| Contig23978 | 1 |
| Contig23929 | 1 |
| Contig23896 | 1 |
| Contig23293 | 1 |
| Contig23168 | 2 |
| Contig23147 | 1 |
| Contig22710 | 1 |
| Contig22504 | 1 |
| Contig22424 | 1 |
| Contig22408 | 1 |
| Contig2229  | 1 |
| Contig22170 | 1 |
| Contig21943 | 1 |
| Contig21854 | 1 |
| Contig2176  | 2 |
| Contig21709 | 1 |

|             |   |
|-------------|---|
| Contig21609 | 1 |
| Contig21422 | 1 |
| Contig21350 | 1 |
| Contig21171 | 3 |
| Contig21087 | 3 |
| Contig20924 | 3 |
| Contig2087  | 2 |
| Contig2068  | 1 |
| Contig20543 | 1 |
| Contig19753 | 1 |
| Contig19663 | 1 |
| Contig19607 | 1 |
| Contig19420 | 7 |
| Contig1890  | 1 |
| Contig18880 | 1 |
| Contig18557 | 1 |
| Contig18385 | 4 |
| Contig18104 | 1 |
| Contig18033 | 6 |
| Contig17946 | 1 |
| Contig17880 | 1 |
| Contig17831 | 1 |
| Contig17332 | 2 |
| Contig17296 | 3 |
| Contig16920 | 1 |
| Contig16895 | 1 |
| Contig16825 | 2 |
| Contig16402 | 1 |
| Contig1604  | 1 |
| Contig15920 | 1 |
| Contig15874 | 1 |
| Contig15732 | 2 |
| Contig15684 | 2 |
| Contig15674 | 6 |
| Contig15471 | 3 |
| Contig15015 | 1 |
| Contig14654 | 1 |
| Contig14456 | 3 |
| Contig14376 | 1 |
| Contig1425  | 3 |
| Contig14144 | 2 |
| Contig136   | 2 |
| Contig13439 | 2 |
| Contig13371 | 1 |
| Contig13277 | 1 |
| Contig13241 | 2 |



|             |   |
|-------------|---|
| Contig13164 | 2 |
| Contig1305  | 1 |
| Contig12663 | 1 |
| Contig12483 | 1 |
| Contig12178 | 1 |
| Contig12149 | 2 |
| Contig11938 | 1 |
| Contig11832 | 3 |
| Contig11799 | 1 |
| Contig10828 | 1 |
| Contig10651 | 1 |
| Contig10551 | 1 |

Table S4: Information of succinylated proteins involved in glycolysis, pyruvate metabolism and TCA cycle.

| Protein     | Enzyme Nomenclature | Abbreviation | Function                                     | Sites |
|-------------|---------------------|--------------|----------------------------------------------|-------|
| Contig8976  | EC:5.4.2.2          | PGM          | Alpha-D-phosphohexomutase                    | 1     |
| Contig25672 | EC:4.1.2.13         | ALDO         | fructose-bisphosphate aldolase               | 2     |
| Contig32731 | EC:2.7.2.3          | PGK          | phosphoglycerate kinase                      | 3     |
| Contig4152  | EC:4.2.1.11         | ENO          | enolase                                      | 1     |
| Contig32010 | EC:1.2.4.1          | PDHB         | pyruvate dehydrogenase                       | 1     |
| Contig7916  | EC:1.8.1.4          | DLD          | dihydrolipoamide dehydrogenase               | 7     |
| Contig21171 | EC:2.3.1.12         | DLAT         | pyruvate dehydrogenase                       | 3     |
| Contig32590 | EC:1.2.1.3          | ALDH         | aldehyde dehydrogenase                       | 1     |
| Contig38639 | EC:1.1.1.1          | frmA         | S-(hydroxymethyl)glutathione dehydrogenase   | 1     |
| Contig18385 | EC:2.3.3.1          | CS           | citrate synthase                             | 4     |
| Contig8619  | EC:4.2.1.3          | ACO          | aconitate hydratase                          | 4     |
| Contig24602 | EC:1.1.1.42         | IDH1         | isocitrate dehydrogenase                     | 2     |
| Contig26853 | EC:1.1.1.41         | IDH3         | isocitrate dehydrogenase (NAD <sup>+</sup> ) | 1     |
| Contig2087  | EC:1.2.4.2          | OGDH         | 2-oxoglutarate dehydrogenase                 | 2     |
| Contig3710  | EC:2.3.1.61         | DLST         | 2-oxoglutarate dehydrogenase                 | 3     |
| Contig4446  | EC:6.2.1.5          | LSC1         | succinyl-CoA synthetase                      | 5     |
| Contig18557 | EC:6.2.1.4          | LSC2         | succinyl-CoA synthetase                      | 1     |
| Contig43437 | EC:1.3.5.1          | SDHA         | succinate dehydrogenase                      | 1     |
| Contig4938  | EC:1.1.1.37         | MDH2         | malate dehydrogenase                         | 1     |

Table S5: Information of succinylated proteins involved in carbon fixation.

| Protein     | Enzyme Nomenclature |               | Function                                 | Sites |
|-------------|---------------------|---------------|------------------------------------------|-------|
| Contig25672 | EC:4.1.2.13         | ALDO          | fructose-bisphosphate aldolase           | 2     |
| Contig25407 | EC:3.1.3.37         | SBPase        | sedoheptulose-bisphosphatase             | 4     |
| Contig42340 | EC:2.2.1.1          | Transketolase | transketolase                            | 3     |
| Contig15471 | EC:4.1.1.39         | RBCS          | ribulose-bisphosphate carboxylase        | 3     |
| Contig32731 | EC:2.7.2.3          | PGK           | phosphoglycerate kinase                  | 3     |
| Contig42616 | EC:1.2.1.13         | GAPA          | glyceraldehyde-3-phosphate dehydrogenase | 2     |
| Contig25672 | EC:4.1.2.13         | ALDO          | fructose-bisphosphate aldolase           | 2     |
| Contig3195  | EC:5.3.1.1          | TPI           | triosephosphate isomerase                | 1     |
| Contig29422 | EC:2.6.1.1          | GOT2          | aspartate aminotransferase               | 1     |
| Contig4938  | EC:1.1.1.37         | MDH1          | malate dehydrogenase                     | 1     |
| Contig16825 | EC:1.1.1.39         | MDH2          | malate dehydrogenase                     | 2     |
| Contig34715 | EC:2.6.1.2          | GGAT          | glutamate-glyoxylate aminotransferase    | 1     |

Table S6: The information of 162 succinylated proteins that involved in Protein-protein interactions (PPIs) network.

| Node name                               | Protein     | No. of m | Degree | MCODE | Subcellular Locati |
|-----------------------------------------|-------------|----------|--------|-------|--------------------|
| 3694.grail3.0106005101                  | Contig41812 | 1        | 17     | 7.27  | mitochondria       |
| 3694.gw1.X.1285.1                       | Contig3457  | 1        | 11     | 7.00  | chloroplast        |
| 3694.estExt_Genewise1_v1.C_LG_XVIII1357 | Contig23929 | 1        | 26     | 7.27  | mitochondria       |
| 3694.grail3.0010030801                  | Contig7916  | 7        | 26     | 6.98  | chloroplast        |
| 3694.estExt_fgenes4_pg.C_LG_I2224       | Contig43437 | 1        | 23     | 8.18  | mitochondria       |
| 3694.gw1.6399.1.1                       | Contig23168 | 2        | 15     | 7.47  | plasma membrane    |
| 3694.estExt_fgenes4_pg.C_LG_XVI0781     | Contig21087 | 3        | 22     | 8.00  | chloroplast        |
| 3694.estExt_fgenes4_kg.C_LG_IX0036      | Contig10551 | 1        | 22     | 8.18  | mitochondria       |
| 3694.eugene3.00130573                   | Contig40889 | 2        | 15     | 8.00  | cytosol            |
| 3694.estExt_fgenes4_pm.C_LG_VIII0532    | Contig39434 | 2        | 13     | 6.81  | chloroplast        |
| 3694.estExt_fgenes4_pm.C_LG_XVIII0241   | Contig392   | 3        | 20     | 8.00  | cytosol            |
| 3694.estExt_fgenes4_pm.C_LG_VIII0144    | Contig20924 | 3        | 16     | 8.18  | cytosol            |
| 3694.estExt_fgenes4_pg.C_LG_XIV0805     | Contig2176  | 2        | 7      | 7.00  | cytosol            |
| 3694.estExt_Genewise1_v1.C_LG_IV0774    | Contig25672 | 2        | 13     | 6.81  | chloroplast        |
| 3694.estExt_fgenes4_pm.C_LG_IX0030      | Contig26853 | 1        | 22     | 8.00  | chloroplast        |
| 3694.eugene3.00021349                   | Contig42340 | 3        | 13     | 6.81  | chloroplast        |
| 3694.eugene3.00040033                   | Contig25601 | 1        | 19     | 7.27  | chloroplast        |
| 3694.eugene3.00180798                   | Contig27826 | 1        | 13     | 6.81  | cytosol            |
| 3694.eugene3.00151093                   | Contig4152  | 1        | 8      | 6.81  | cytosol            |
| 3694.estExt_Genewise1_v1.C_LG_VIII1306  | Contig22170 | 1        | 20     | 7.27  | chloroplast        |
| 3694.gw1.20770.4.1                      | Contig33055 | 7        | 15     | 7.47  | cytosol            |
| 3694.estExt_fgenes4_pg.C_LG_X1053       | Contig14456 | 3        | 20     | 7.27  | mitochondria       |
| 3694.gw1.XIV.3012.1                     | Contig29422 | 1        | 20     | 8.00  | mitochondria       |
| 3694.estExt_fgenes4_pm.C_LG_XII0223     | Contig34873 | 2        | 19     | 7.27  | mitochondria       |
| 3694.fgenes4_pg.C_LG_X001588            | Contig34627 | 2        | 21     | 8.00  | chloroplast        |
| 3694.estExt_fgenes4_pm.C_LG_X0655       | Contig32731 | 3        | 16     | 6.81  | chloroplast        |
| 3694.estExt_Genewise1_v1.C_LG_IX1362    | Contig3195  | 1        | 12     | 6.81  | chloroplast        |
| 3694.gw1.6399.6.1                       | Contig9268  | 1        | 15     | 7.47  | cytosol            |
| 3694.estExt_fgenes4_pm.C_LG_V0707       | Contig42616 | 2        | 7      | 7.00  | chloroplast        |
| 3694.gw1.82.189.1                       | Contig2068  | 1        | 24     | 6.53  | chloroplast        |
| 3694.grail3.0001073802                  | Contig11832 | 3        | 19     | 6.00  | cytosol            |
| 3694.gw1.XIV.1833.1                     | Contig32159 | 1        | 9      | 7.00  | chloroplast        |
| 3694.grail3.0012036701                  | Contig43475 | 1        | 21     | 6.53  | chloroplast        |
| 3694.estExt_Genewise1_v1.C_LG_XVI2794   | Contig28856 | 1        | 26     | 5.80  | chloroplast        |
| 3694.estExt_Genewise1_v1.C_LG_I8285     | Contig11799 | 1        | 19     | 6.53  | chloroplast        |
| 3694.estExt_fgenes4_pg.C_LG_I1607       | Contig18033 | 6        | 22     | 7.00  | cytosol            |
| 3694.estExt_fgenes4_pm.C_1480010        | Contig18385 | 4        | 26     | 5.80  | cytosol            |
| 3694.estExt_fgenes4_pg.C_LG_VIII0227    | Contig21422 | 1        | 15     | 6.00  | chloroplast        |
| 3694.estExt_fgenes4_pm.C_LG_XIII0026    | Contig21350 | 1        | 19     | 6.53  | chloroplast        |
| 3694.fgenes4_pg.C_LG_III000191          | Contig21171 | 3        | 16     | 6.00  | mitochondria       |
| 3694.grail3.0023029001                  | Contig8228  | 1        | 10     | 7.00  | chloroplast        |
| 3694.eugene3.00020518                   | Contig1305  | 1        | 14     | 6.53  | cytosol            |
| 3694.estExt_fgenes4_pg.C_660263         | Contig26908 | 1        | 8      | 2.40  | mitochondria       |
| 3694.estExt_Genewise1_v1.C_280199       | Contig7684  | 2        | 6      | 2.20  | chloroplast        |
| 3694.estExt_fgenes4_pm.C_LG_I0780       | Contig13164 | 2        | 6      | 2.20  | chloroplast        |

|                                       |             |   |    |      |                     |
|---------------------------------------|-------------|---|----|------|---------------------|
| 3694.estExt_fgenesh4_pm.C_LG_I0166    | Contig17296 | 3 | 8  | 2.40 | mitochondria        |
| 3694.estExt_Genewise1_v1.C_LG_III2625 | Contig17332 | 2 | 8  | 2.40 | chloroplast         |
| 3694.gw1.XVII.594.1                   | Contig20543 | 1 | 8  | 2.00 | chloroplast         |
| 3694.estExt_Genewise1_v1.C_LG_XI2343  | Contig26568 | 1 | 8  | 2.00 | nuclear             |
| 3694.estExt_fgenesh4_pg.C_LG_XIII0274 | Contig25940 | 1 | 6  | 2.20 | cytosol             |
| 3694.eugene3.00140509                 | Contig35181 | 1 | 5  | 4.00 | cytosol             |
| 3694.gw1.683.11.1                     | Contig5591  | 1 | 7  | 4.00 | cytosol             |
| 3694.eugene3.00050364                 | Contig28049 | 1 | 8  | 4.00 | cytosol             |
| 3694.estExt_Genewise1_v1.C_LG_X3287   | Contig19607 | 1 | 6  | 4.00 | cytosol             |
| 3694.estExt_Genewise1_v1.C_LG_XI0817  | Contig19753 | 1 | 7  | 4.00 | cytosol             |
| 3694.estExt_Genewise1_v1.C_LG_XI2803  | Contig3710  | 3 | 20 | 5.73 | mitochondria        |
| 3694.grail3.0044016201                | Contig24602 | 2 | 18 | 4.80 | cytosol             |
| 3694.estExt_fgenesh4_pm.C_LG_I0194    | Contig25285 | 1 | 15 | 4.67 | chloroplast         |
| 3694.estExt_Genewise1_v1.C_LG_XIV0188 | Contig4446  | 5 | 19 | 4.93 | mitochondria        |
| 3694.estExt_fgenesh4_pg.C_LG_II2062   | Contig8619  | 4 | 10 | 5.50 | cytosol             |
| 3694.estExt_fgenesh4_pm.C_LG_V0127    | Contig18557 | 1 | 15 | 4.93 | mitochondria        |
| 3694.gw1.X.5451.1                     | Contig29215 | 2 | 16 | 4.67 | mitochondria        |
| 3694.gw1.VII.3485.1                   | Contig13241 | 2 | 13 | 4.76 | chloroplast         |
| 3694.eugene3.00150408                 | Contig27743 | 1 | 19 | 3.89 | chloroplast         |
| 3694.gw1.III.1082.1                   | Contig15732 | 2 | 7  | 4.00 | cytosol             |
| 3694.estExt_fgenesh4_pg.C_2520014     | Contig42338 | 6 | 15 | 4.00 | chloroplast         |
| 3694.estExt_fgenesh4_pm.C_LG_X0942    | Contig5689  | 2 | 9  | 4.00 | mitochondria        |
| 3694.estExt_fgenesh4_pm.C_280146      | Contig30441 | 1 | 10 | 4.11 | chloroplast         |
| 3694.gw1.VIII.591.1                   | Contig34617 | 1 | 5  | 3.00 | cytoskeleton        |
| 3694.gw1.X.2081.1                     | Contig39307 | 1 | 6  | 3.00 | chloroplast         |
| 3694.estExt_fgenesh4_pg.C_LG_XVII0246 | Contig8749  | 1 | 3  | 3.00 | cytosol             |
| 3694.estExt_fgenesh4_pg.C_LG_VIII0421 | Contig2087  | 2 | 26 | 4.57 | chloroplast,mitocho |
| 3694.grail3.0008003701                | Contig21609 | 1 | 18 | 2.12 | cytosol             |
| 3694.eugene3.00060644                 | Contig31735 | 2 | 4  | 3.00 | cytosol             |
| 3694.gw1.X.1500.1                     | Contig15015 | 1 | 9  | 4.00 | chloroplast         |
| 3694.fgenesh4_pm.C_LG_XIV000150       | Contig36350 | 1 | 1  | 0.00 | chloroplast         |
| 3694.grail3.0010031101                | Contig1604  | 1 | 4  | 3.00 | chloroplast         |
| 3694.eugene3.00130195                 | Contig15874 | 1 | 6  | 4.00 | plasma membrane     |
| 3694.eugene3.00010969                 | Contig6895  | 2 | 1  | 0.00 | plasma membrane     |
| 3694.gw1.513.7.1                      | Contig1890  | 1 | 11 | 2.25 | extracellular       |
| 3694.gw1.14458.2.1                    | Contig15674 | 6 | 11 | 1.58 | mitochondria        |
| 3694.estExt_fgenesh4_pm.C_LG_IX0400   | Contig29956 | 5 | 10 | 1.20 | chloroplast         |
| 3694.estExt_fgenesh4_pm.C_LG_VI0678   | Contig26084 | 1 | 16 | 3.33 | chloroplast         |
| 3694.eugene3.00100819                 | Contig26788 | 2 | 16 | 4.32 | chloroplast         |
| 3694.estExt_fgenesh4_pg.C_LG_X0989    | Contig8976  | 1 | 14 | 6.00 | cytosol             |
| 3694.grail3.0021033801                | Contig38639 | 1 | 2  | 0.67 | cytosol             |
| 3694.gw1.28.53.1                      | Contig19663 | 1 | 4  | 3.00 | cytosol             |
| 3694.eugene3.00101874                 | Contig25407 | 4 | 9  | 4.00 | chloroplast         |
| 3694.gw1.XVIII.3218.1                 | Contig25847 | 2 | 5  | 3.00 | cytosol             |
| 3694.estExt_fgenesh4_pg.C_1500058     | Contig12483 | 1 | 10 | 1.20 | chloroplast         |
| 3694.estExt_Genewise1_v1.C_LG_XVI3692 | Contig3575  | 1 | 4  | 1.40 | extracellular       |

|                                        |             |   |    |      |                     |
|----------------------------------------|-------------|---|----|------|---------------------|
| 3694.fgenes4_pm.C_LG_I000162           | Contig12149 | 2 | 14 | 2.78 | chloroplast         |
| 3694.estExt_fgenes4_pg.C_LG_II1218     | Contig16825 | 2 | 10 | 1.67 | chloroplast         |
| 3694.eugene3.00021450                  | Contig34414 | 1 | 4  | 2.00 | chloroplast,mitocho |
| 3694.fgenes4_pg.C_LG_IV000431          | Contig4938  | 1 | 15 | 3.89 | mitochondria        |
| 3694.estExt_fgenes4_pm.C_LG_II0915     | Contig32590 | 1 | 5  | 1.20 | mitochondria        |
| 3694.estExt_fgenes4_pm.C_290034        | Contig14144 | 2 | 9  | 4.00 | cytosol             |
| 3694.gw1.VII.539.1                     | Contig27136 | 3 | 2  | 0.67 | chloroplast         |
| 3694.eugene3.00081764                  | Contig34715 | 1 | 12 | 5.00 | cytosol             |
| 3694.estExt_Genewise1_v1.C_LG_II2125   | Contig35316 | 1 | 4  | 1.67 | cytosol             |
| 3694.estExt_fgenes4_pm.C_LG_IV0266     | Contig33154 | 3 | 4  | 1.67 | cytosol             |
| 3694.eugene3.01460031                  | Contig38899 | 3 | 7  | 1.20 | cytosol             |
| 3694.estExt_fgenes4_kg.C_LG_IV0030     | Contig12663 | 1 | 8  | 4.29 | cytosol             |
| 3694.estExt_fgenes4_pg.C_LG_III1351    | Contig18880 | 1 | 2  | 0.67 | chloroplast         |
| 3694.gw1.VII.3752.1                    | Contig8119  | 1 | 2  | 0.67 | chloroplast         |
| 3694.estExt_fgenes4_pg.C_LG_VIII1183   | Contig17880 | 1 | 6  | 3.00 | nuclear             |
| 3694.estExt_fgenes4_pg.C_LG_III1684    | Contig1425  | 3 | 4  | 3.00 | chloroplast         |
| 3694.eugene3.00010884                  | Contig31013 | 3 | 5  | 3.00 | chloroplast         |
| 3694.estExt_fgenes4_pg.C_LG_X0463      | Contig6045  | 1 | 11 | 5.36 | mitochondria        |
| 3694.eugene3.01230087                  | Contig15471 | 3 | 9  | 2.14 | chloroplast         |
| 3694.eugene3.00110470                  | Contig2510  | 1 | 5  | 3.47 | chloroplast         |
| 3694.estExt_fgenes4_pm.C_LG_I0932      | Contig24949 | 1 | 7  | 2.20 | chloroplast         |
| 3694.estExt_fgenes4_pg.C_1660047       | Contig11938 | 1 | 3  | 3.00 | chloroplast         |
| 3694.estExt_fgenes4_pg.C_LG_I1460      | Contig6724  | 1 | 5  | 3.47 | mitochondria        |
| 3694.estExt_Genewise1_v1.C_LG_XIII3158 | Contig32510 | 3 | 6  | 2.20 | mitochondria        |
| 3694.fgenes4_pm.C_scaffold_163000009   | Contig13277 | 1 | 3  | 2.00 | cytosol             |
| 3694.fgenes4_pm.C_LG_I001114           | Contig21854 | 1 | 10 | 1.20 | mitochondria        |
| 3694.estExt_fgenes4_pg.C_LG_X2033      | Contig17946 | 1 | 1  | 0.00 | chloroplast         |
| 3694.grail3.0202001702                 | Contig22710 | 1 | 4  | 4.00 | chloroplast         |
| 3694.estExt_fgenes4_pm.C_LG_V0695      | Contig35287 | 1 | 11 | 1.71 | peroxisome          |
| 3694.grail3.0002075501                 | Contig17831 | 1 | 5  | 2.70 | nuclear             |
| 3694.eugene3.00160660                  | Contig4298  | 1 | 9  | 2.70 | chloroplast         |
| 3694.grail3.0028013201                 | Contig28157 | 2 | 2  | 2.00 | cytosol             |
| 3694.estExt_fgenes4_pg.C_LG_X0791      | Contig35702 | 1 | 3  | 0.50 | nuclear             |
| 3694.estExt_fgenes4_pg.C_LG_XIV1000    | Contig41772 | 4 | 6  | 3.00 | mitochondria        |
| 3694.estExt_Genewise1_v1.C_LG_I2532    | Contig3264  | 1 | 4  | 2.00 | chloroplast         |
| 3694.gw1.XVIII.2487.1                  | Contig25574 | 1 | 9  | 2.40 | chloroplast         |
| 3694.gw1.130.154.1                     | Contig24406 | 1 | 9  | 4.29 | chloroplast         |
| 3694.estExt_fgenes4_pm.C_LG_VII0233    | Contig35859 | 5 | 8  | 2.70 | chloroplast         |
| 3694.gw1.VI.2058.1                     | Contig36475 | 2 | 19 | 4.12 | chloroplast         |
| 3694.eugene3.00013054                  | Contig16402 | 2 | 3  | 0.50 | nuclear             |
| 3694.eugene3.00091463                  | Contig41858 | 1 | 6  | 3.00 | nuclear             |
| 3694.estExt_fgenes4_pm.C_LG_XIV0571    | Contig23896 | 1 | 3  | 0.50 | chloroplast         |
| 3694.eugene3.00141466                  | Contig28454 | 1 | 3  | 1.67 | cytosol             |
| 3694.eugene3.29900002                  | Contig32342 | 1 | 3  | 0.50 | chloroplast         |
| 3694.estExt_fgenes4_pg.C_LG_VI1023     | Contig7499  | 1 | 3  | 1.67 | chloroplast         |
| 3694.eugene3.00140133                  | Contig38987 | 3 | 1  | 0.00 | chloroplast         |

|                                       |             |   |   |      |             |
|---------------------------------------|-------------|---|---|------|-------------|
| 3694.grail3.0118000701                | Contig8863  | 1 | 5 | 2.00 | chloroplast |
| 3694.estExt_fgenesh4_pg.C_400150      | Contig27558 | 1 | 6 | 2.70 | chloroplast |
| 3694.estExt_Genewise1_v1.C_LG_II2900  | Contig6210  | 1 | 1 | 0.00 | chloroplast |
| 3694.gw1.II.2305.1                    | Contig14654 | 1 | 1 | 0.00 | cytosol     |
| 3694.estExt_Genewise1_v1.C_LG_XI3916  | Contig21709 | 1 | 1 | 0.00 | chloroplast |
| 3694.grail3.0024013201                | Contig4667  | 1 | 3 | 2.00 | chloroplast |
| 3694.eugene3.00131316                 | Contig26567 | 1 | 2 | 0.67 | chloroplast |
| 3694.estExt_Genewise1_v1.C_LG_IX3737  | Contig7357  | 1 | 1 | 0.00 | cytosol     |
| 3694.gw1.127.120.1                    | Contig35075 | 1 | 3 | 1.67 | nuclear     |
| 3694.eugene3.00020135                 | Contig32572 | 3 | 3 | 0.50 | chloroplast |
| 3694.eugene3.00031909                 | Contig454   | 1 | 1 | 0.00 | nuclear     |
| 3694.eugene3.00060732                 | Contig29951 | 1 | 1 | 0.00 | chloroplast |
| 3694.estExt_fgenesh4_pm.C_LG_XIX0169  | Contig23978 | 1 | 1 | 0.00 | cytosol     |
| 3694.estExt_fgenesh4_pm.C_LG_II0162   | Contig10828 | 1 | 3 | 2.00 | cytosol     |
| 3694.estExt_fgenesh4_pg.C_LG_VI0717   | Contig30828 | 1 | 1 | 0.00 | chloroplast |
| 3694.estExt_fgenesh4_pg.C_LG_IV1470   | Contig34759 | 3 | 2 | 2.00 | chloroplast |
| 3694.estExt_fgenesh4_pg.C_LG_III1822  | Contig42134 | 1 | 1 | 0.00 | chloroplast |
| 3694.estExt_Genewise1_v1.C_LG_I0264   | Contig35544 | 1 | 1 | 0.00 | chloroplast |
| 3694.fgenesh4_pm.C_LG_X000986         | Contig22408 | 1 | 1 | 0.00 | chloroplast |
| 3694.gw1.X.2350.1                     | Contig7396  | 1 | 1 | 0.00 | cytosol     |
| 3694.fgenesh4_pm.C_scaffold_166000008 | Contig14376 | 1 | 1 | 0.00 | chloroplast |
| 3694.estExt_fgenesh4_kg.C_LG_X0015    | Contig136   | 2 | 1 | 0.00 | cytosol     |
| 3694.gw1.148.177.1                    | Contig27115 | 2 | 1 | 0.00 | cytosol     |
| 3694.fgenesh4_pg.C_scaffold_135000030 | Contig23147 | 1 | 1 | 0.00 | chloroplast |
| 3694.grail3.0113000401                | Contig35931 | 1 | 1 | 0.00 | cytosol     |

Table S7: The list of the proteins that classed into cluster 1.

| <b>Node name</b>                        | <b>Protein</b> | <b>No. of mo</b> | <b>Degree</b> | <b>MCODE</b> | <b>Subcellular Location</b> |
|-----------------------------------------|----------------|------------------|---------------|--------------|-----------------------------|
| 3694.grail3.0106005101                  | Contig41812    | 1                | 17            | 7.27         | mitochondria                |
| 3694.gw1.X.1285.1                       | Contig3457     | 1                | 11            | 7.00         | chloroplast                 |
| 3694.estExt_Genewise1_v1.C_LG_XVIII1357 | Contig23929    | 1                | 26            | 7.27         | mitochondria                |
| 3694.grail3.0010030801                  | Contig7916     | 7                | 26            | 6.98         | chloroplast                 |
| 3694.estExt_fgenesh4_pg.C_LG_I2224      | Contig43437    | 1                | 23            | 8.18         | mitochondria                |
| 3694.gw1.6399.1.1                       | Contig23168    | 2                | 15            | 7.47         | plasma membrane             |
| 3694.estExt_fgenesh4_pg.C_LG_XVI0781    | Contig21087    | 3                | 22            | 8.00         | chloroplast                 |
| 3694.estExt_fgenesh4_kg.C_LG_IX0036     | Contig10551    | 1                | 22            | 8.18         | mitochondria                |
| 3694.eugene3.00130573                   | Contig40889    | 2                | 15            | 8.00         | cytosol                     |
| 3694.estExt_fgenesh4_pm.C_LG_VIII0532   | Contig39434    | 2                | 13            | 6.81         | chloroplast                 |
| 3694.estExt_fgenesh4_pm.C_LG_XVIII0241  | Contig392      | 3                | 20            | 8.00         | cytosol                     |
| 3694.estExt_fgenesh4_pm.C_LG_VIII0144   | Contig20924    | 3                | 16            | 8.18         | cytosol                     |
| 3694.estExt_fgenesh4_pg.C_LG_XIV0805    | Contig2176     | 2                | 7             | 7.00         | cytosol                     |
| 3694.estExt_Genewise1_v1.C_LG_IV0774    | Contig25672    | 2                | 13            | 6.81         | chloroplast                 |
| 3694.estExt_fgenesh4_pm.C_LG_IX0030     | Contig26853    | 1                | 22            | 8.00         | chloroplast                 |
| 3694.eugene3.00021349                   | Contig42340    | 3                | 13            | 6.81         | chloroplast                 |
| 3694.eugene3.00040033                   | Contig25601    | 1                | 19            | 7.27         | chloroplast                 |
| 3694.eugene3.00180798                   | Contig27826    | 1                | 13            | 6.81         | cytosol                     |
| 3694.eugene3.00151093                   | Contig4152     | 1                | 8             | 6.81         | cytosol                     |
| 3694.estExt_Genewise1_v1.C_LG_VIII1306  | Contig22170    | 1                | 20            | 7.27         | chloroplast                 |
| 3694.gw1.20770.4.1                      | Contig33055    | 7                | 15            | 7.47         | cytosol                     |
| 3694.estExt_fgenesh4_pg.C_LG_X1053      | Contig14456    | 3                | 20            | 7.27         | mitochondria                |
| 3694.gw1.XIV.3012.1                     | Contig29422    | 1                | 20            | 8.00         | mitochondria                |
| 3694.estExt_fgenesh4_pm.C_LG_XII0223    | Contig34873    | 2                | 19            | 7.27         | mitochondria                |
| 3694.fgenesh4_pg.C_LG_X001588           | Contig34627    | 2                | 21            | 8.00         | chloroplast                 |
| 3694.estExt_fgenesh4_pm.C_LG_X0655      | Contig32731    | 3                | 16            | 6.81         | chloroplast                 |
| 3694.estExt_Genewise1_v1.C_LG_IX1362    | Contig3195     | 1                | 12            | 6.81         | chloroplast                 |
| 3694.gw1.6399.6.1                       | Contig9268     | 1                | 15            | 7.47         | cytosol                     |
| 3694.estExt_fgenesh4_pm.C_LG_V0707      | Contig42616    | 2                | 7             | 7.00         | chloroplast                 |



Table S8: The list of the proteins that classed into cluster 2.

| <b>Node name</b>                      | <b>Protein</b> | <b>No. of mod</b> | <b>Degree</b> | <b>MCODE_</b> | <b>Subcellular Location</b> |
|---------------------------------------|----------------|-------------------|---------------|---------------|-----------------------------|
| 3694.gw1.82.189.1                     | Contig2068     | 1                 | 24            | 6.5333333     | chloroplast                 |
| 3694.grail3.0001073802                | Contig11832    | 3                 | 19            | 6             | cytosol                     |
| 3694.gw1.XIV.1833.1                   | Contig32159    | 1                 | 9             | 7             | chloroplast                 |
| 3694.grail3.0012036701                | Contig43475    | 1                 | 21            | 6.5333333     | chloroplast                 |
| 3694.estExt_Genewise1_v1.C_LG_XVI2794 | Contig28856    | 1                 | 26            | 5.8           | chloroplast                 |
| 3694.estExt_Genewise1_v1.C_LG_I8285   | Contig11799    | 1                 | 19            | 6.5333333     | chloroplast                 |
| 3694.estExt_fgenesh4_pg.C_LG_I1607    | Contig18033    | 6                 | 22            | 7             | cytosol                     |
| 3694.estExt_fgenesh4_pm.C_1480010     | Contig18385    | 4                 | 26            | 5.8           | cytosol                     |
| 3694.estExt_fgenesh4_pg.C_LG_VIII0227 | Contig21422    | 1                 | 15            | 6             | chloroplast                 |
| 3694.estExt_fgenesh4_pm.C_LG_XIII0026 | Contig21350    | 1                 | 19            | 6.5333333     | chloroplast                 |
| 3694.fgenesh4_pg.C_LG_III000191       | Contig21171    | 3                 | 16            | 6             | mitochondria                |
| 3694.grail3.0023029001                | Contig8228     | 1                 | 10            | 7             | chloroplast                 |
| 3694.eugene3.00020518                 | Contig1305     | 1                 | 14            | 6.5333333     | cytosol                     |

Table S9: The list of the proteins that classed into cluster 3.

| <b>Node name</b>                      | <b>Protein</b> | <b>No. of mod</b> | <b>Degree</b> | <b>MCODE_Score</b> | <b>Subcellular Location</b> |
|---------------------------------------|----------------|-------------------|---------------|--------------------|-----------------------------|
| 3694.estExt_fgenes4_pg.C_660263       | Contig26908    | 1                 | 8             | 2.4                | mitochondria                |
| 3694.estExt_Genewise1_v1.C_280199     | Contig7684     | 2                 | 6             | 2.2                | chloroplast                 |
| 3694.estExt_fgenes4_pm.C_LG_I0780     | Contig13164    | 2                 | 6             | 2.2                | chloroplast                 |
| 3694.estExt_fgenes4_pm.C_LG_I0166     | Contig17296    | 3                 | 8             | 2.4                | mitochondria                |
| 3694.estExt_Genewise1_v1.C_LG_III2625 | Contig17332    | 2                 | 8             | 2.4                | chloroplast                 |
| 3694.gw1.XVII.594.1                   | Contig20543    | 1                 | 8             | 2                  | chloroplast                 |
| 3694.estExt_Genewise1_v1.C_LG_XI2343  | Contig26568    | 1                 | 8             | 2                  | nuclear                     |
| 3694.estExt_fgenes4_pg.C_LG_XIII0274  | Contig25940    | 1                 | 6             | 2.2                | cytosol                     |

Table S10: The list of the proteins that classed into cluster 4.

| <b>Node name</b>                     | <b>Protein</b> | <b>No. of sites</b> | <b>Degree</b> | <b>MCODE</b> | <b>Subcellular Location</b> |
|--------------------------------------|----------------|---------------------|---------------|--------------|-----------------------------|
| 3694.eugene3.00140509                | Contig35181    | 1                   | 5             | 4            | cytosol                     |
| 3694.gw1.683.11.1                    | Contig5591     | 1                   | 7             | 4            | cytosol                     |
| 3694.eugene3.00050364                | Contig28049    | 1                   | 8             | 4            | cytosol                     |
| 3694.estExt_Genewise1_v1.C_LG_X3287  | Contig19607    | 1                   | 6             | 4            | cytosol                     |
| 3694.estExt_Genewise1_v1.C_LG_XI0817 | Contig19753    | 1                   | 7             | 4            | cytosol                     |

Table S11: The list of the proteins that classed into cluster 5.

| <b>Node name</b>                      | <b>Protein</b> | <b>No. of sites</b> | <b>Degree</b> | <b>MCODE</b> | <b>Subcellular Location</b> |
|---------------------------------------|----------------|---------------------|---------------|--------------|-----------------------------|
| 3694.estExt_Genewise1_v1.C_LG_XI2803  | Contig3710     | 3                   | 20            | 5.72727      | mitochondria                |
| 3694.grail3.0044016201                | Contig24602    | 2                   | 18            | 4.8          | cytosol                     |
| 3694.estExt_fgenes4_pm.C_LG_I0194     | Contig25285    | 1                   | 15            | 4.66667      | chloroplast                 |
| 3694.estExt_Genewise1_v1.C_LG_XIV0188 | Contig4446     | 5                   | 19            | 4.93333      | mitochondria                |
| 3694.estExt_fgenes4_pg.C_LG_II2062    | Contig8619     | 4                   | 10            | 5.5          | cytosol                     |
| 3694.estExt_fgenes4_pm.C_LG_V0127     | Contig18557    | 1                   | 15            | 4.93333      | mitochondria                |
| 3694.gw1.X.5451.1                     | Contig29215    | 2                   | 16            | 4.66667      | mitochondria                |
| 3694.gw1.VII.3485.1                   | Contig13241    | 2                   | 13            | 4.7619       | chloroplast                 |

Table S12: Comparison of *Taxus × media* succinylated proteins with different reported species.

| organism                          | no. of succinylated proteins | no. of succinylated sites | sites per protein |
|-----------------------------------|------------------------------|---------------------------|-------------------|
| <i>Taxus × media</i>              | 193                          | 325                       | 1.68              |
| <i>Mycobacterium tuberculosis</i> | 686                          | 1732                      | 2.52              |
| <i>E.Coli</i>                     | 990                          | 2572                      | 2.6               |
| <i>Toxoplasma gondii</i>          | 147                          | 425                       | 2.89              |
| <i>S. cerevisiae</i>              | 474                          | 1345                      | 2.84              |
